# Supplementary material for: An optimal regulation of fluxes dictates microbial growth in and out of steady state
Source: eLife journal article supplement (doi:10.7554/elife.84878), 2023-03-10
Supplement: supp [file elife-84878-supp-v1.zip]

Archive with 15 entries (15 files):
- elife_poa_e84878_Figure_1_figure_supplement_1.pdf
- elife_poa_e84878_Figure_1_figure_supplement_2.pdf
- elife_poa_e84878_Figure_1_figure_supplement_3.pdf
- elife_poa_e84878_Figure_1_figure_supplement_4.pdf
- elife_poa_e84878_Figure_2_figure_supplement_1.pdf
- elife_poa_e84878_Figure_3_figure_supplement_1.pdf
- elife_poa_e84878_Figure_1_source_data_1.csv
- elife_poa_e84878_Figure_1_source_data_2.csv
- elife_poa_e84878_Figure_3_source_data_1.csv
- elife_poa_e84878_Figure_3_source_data_2.csv
- elife_poa_e84878_Figure_4_source_data_1.csv
- elife_poa_e84878_Supplementary_file_1.xlsx
- elife_poa_e84878_Supplementary_file_2.xlsx
- elife_poa_e84878_Supplementary_file_3.xlsx
- elife_poa_e84878_Supplementary_file_4.xlsx
