# Supplementary material for: An optimal regulation of fluxes dictates microbial growth in and out of steady state
Source: eLife journal article supplement (doi:10.7554/elife.84878), 2023-03-10

(A)

well-mixed  
culture

clonal  
population

defined enviromental  
composition

total biomass  
as observable

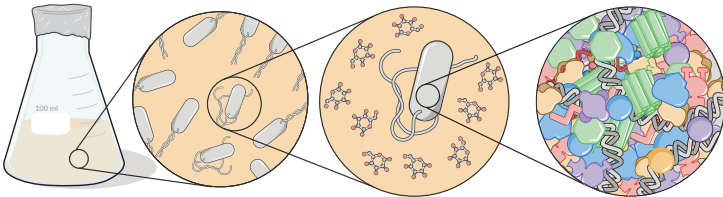

(B)

low-dimensional  
proteome composition

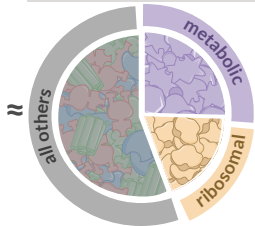

Supplement: supp [file elife-84878-supp-v1.zip › elife_poa_e84878_Figure_1_figure_supplement_1.pdf]
