# Supplementary material for: An optimal regulation of fluxes dictates microbial growth in and out of steady state
Source: eLife journal article supplement (doi:10.7554/elife.84878), 2023-03-10

**(A) i) metabolic rate**

$$\nu(c_{nt}) = \nu_{max} \frac{c_{nt}}{c_{nt} + K_M^{c_{nt}}}$$

Labels in the equation:  
 $\nu_{max}$ : maximal metabolic rate  
 $K_M^{c_{nt}}$ : Michaelis-Menten constant

**(A) ii) precursor dynamics**

$$\frac{dc_{pc}}{dt} = \underbrace{\frac{\nu(c_{nt}) M_{Mb}}{M}}_{\text{synthesis}} - \underbrace{\frac{\gamma(c_{pc}) M_{Rb}}{M}}_{\text{consumption}} - \underbrace{\frac{c_{pc} \gamma(c_{pc}) M_{Rb}}{M}}_{\text{dilution}}$$

Labels in the equation:  
 $c_{pc}$ : precursor concentration  
 $M_{Mb}$ : total metabolic protein mass  
 $\nu(c_{nt})$ : metabolic rate

**(A) iii) nutrient dynamics**

$$\frac{dc_{nt}}{dt} = - \frac{\nu(c_{nt}) M_{Mb}}{\underbrace{Y}_{\text{yield coefficient}}}$$

Labels in the equation:  
 $c_{nt}$ : nutrient concentration  
 $Y$ : yield coefficient

**(B) Model parameters, dimensions, and values**

| parameter      | dimensions    | E. coli value                        | reference                          |
|----------------|---------------|--------------------------------------|------------------------------------|
| $c_{nt}$       | concentration | $\approx 10$ mM (glucose)            | -                                  |
| $K_M^{c_{nt}}$ | concentration | $5 \times 10^{-4}$ M                 | Scott et al., 2010                 |
| $Y$            | AA / mmol     | $3 \times 10^{19}$ AA / mmol glucose | This study & Shiloach & Fass, 2005 |

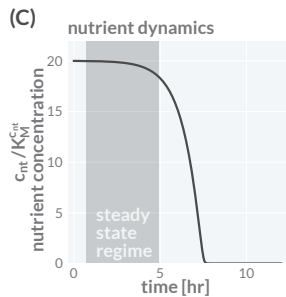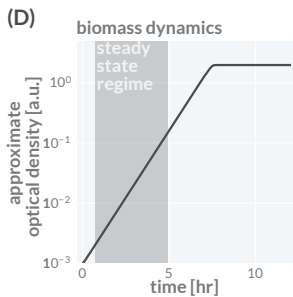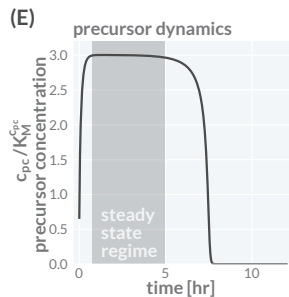

Supplement: supp [file elife-84878-supp-v1.zip › elife_poa_e84878_Figure_1_figure_supplement_2.pdf]
