# Supplementary material for: An optimal regulation of fluxes dictates microbial growth in and out of steady state
Source: eLife journal article supplement (doi:10.7554/elife.84878), 2023-03-10
Supplement: supp [file elife-84878-supp-v1.zip › elife_poa_e84878_Figure_1_source_data_1.csv]

#####################################################################################
# Ribosomal Protein Mass Fractions in E. coli
# =================================================
# Collated measurements of the ribosomal protein proteome mass fraction in E. coli
# and the corresponding steady-state growth rate. Growth rates are provided in
# inverse hours. The "notes" column provides details regarding where
# the data came from in each source entry.
#####################################################################################
growth_rate_hr	mass_fraction	source	method	notes
1.934	0.272	Li et al., 2014	Ribosomal Profiling	Data taken from Belliveau and Chure et al. 2021
1.569	0.198	Li et al., 2014	Ribosomal Profiling	Data taken from Belliveau and Chure et al. 2021
0.739	0.124	Li et al., 2014	Ribosomal Profiling	Data taken from Belliveau and Chure et al. 2021
0.660	0.118	Schmidt et al., 2016	Mass Spectrometry	Data taken from Belliveau and Chure et al. 2021
0.300	0.065	Schmidt et al., 2016	Mass Spectrometry	Data taken from Belliveau and Chure et al. 2021
0.120	0.059	Schmidt et al., 2016	Mass Spectrometry	Data taken from Belliveau and Chure et al. 2021
0.200	0.063	Schmidt et al., 2016	Mass Spectrometry	Data taken from Belliveau and Chure et al. 2021
0.350	0.070	Schmidt et al., 2016	Mass Spectrometry	Data taken from Belliveau and Chure et al. 2021
0.500	0.094	Schmidt et al., 2016	Mass Spectrometry	Data taken from Belliveau and Chure et al. 2021
0.650	0.121	Schmidt et al., 2016	Mass Spectrometry	Data taken from Belliveau and Chure et al. 2021
0.420	0.088	Schmidt et al., 2016	Mass Spectrometry	Data taken from Belliveau and Chure et al. 2021
0.260	0.073	Schmidt et al., 2016	Mass Spectrometry	Data taken from Belliveau and Chure et al. 2021
0.460	0.098	Schmidt et al., 2016	Mass Spectrometry	Data taken from Belliveau and Chure et al. 2021
0.580	0.120	Schmidt et al., 2016	Mass Spectrometry	Data taken from Belliveau and Chure et al. 2021
0.470	0.103	Schmidt et al., 2016	Mass Spectrometry	Data taken from Belliveau and Chure et al. 2021
1.270	0.148	Schmidt et al., 2016	Mass Spectrometry	Data taken from Belliveau and Chure et al. 2021
1.900	0.204	Schmidt et al., 2016	Mass Spectrometry	Data taken from Belliveau and Chure et al. 2021
0.470	0.090	Schmidt et al., 2016	Mass Spectrometry	Data taken from Belliveau and Chure et al. 2021
0.550	0.104	Schmidt et al., 2016	Mass Spectrometry	Data taken from Belliveau and Chure et al. 2021
0.630	0.105	Schmidt et al., 2016	Mass Spectrometry	Data taken from Belliveau and Chure et al. 2021
0.400	0.081	Schmidt et al., 2016	Mass Spectrometry	Data taken from Belliveau and Chure et al. 2021
0.440	0.095	Schmidt et al., 2016	Mass Spectrometry	Data taken from Belliveau and Chure et al. 2021
0.550	0.113	Schmidt et al., 2016	Mass Spectrometry	Data taken from Belliveau and Chure et al. 2021
0.000	0.040	Dai et al., 2016	Measurement of RNA to Protein ratio	Data taken from Table S3
0.033	0.044	Dai et al., 2016	Measurement of RNA to Protein ratio	Data taken from Table S3
0.128	0.055	Dai et al., 2016	Measurement of RNA to Protein ratio	Data taken from Table S3
0.197	0.059	Dai et al., 2016	Measurement of RNA to Protein ratio	Data taken from Table S3
0.231	0.061	Dai et al., 2016	Measurement of RNA to Protein ratio	Data taken from Table S3
0.285	0.067	Dai et al., 2016	Measurement of RNA to Protein ratio	Data taken from Table S3
0.336	0.069	Dai et al., 2016	Measurement of RNA to Protein ratio	Data taken from Table S3
0.407	0.078	Dai et al., 2016	Measurement of RNA to Protein ratio	Data taken from Table S3
0.418	0.077	Dai et al., 2016	Measurement of RNA to Protein ratio	Data taken from Table S3
0.452	0.078	Dai et al., 2016	Measurement of RNA to Protein ratio	Data taken from Table S3
0.486	0.083	Dai et al., 2016	Measurement of RNA to Protein ratio	Data taken from Table S3
0.550	0.086	Dai et al., 2016	Measurement of RNA to Protein ratio	Data taken from Table S3
0.673	0.098	Dai et al., 2016	Measurement of RNA to Protein ratio	Data taken from Table S3
0.686	0.098	Dai et al., 2016	Measurement of RNA to Protein ratio	Data taken from Table S3
0.700	0.098	Dai et al., 2016	Measurement of RNA to Protein ratio	Data taken from Table S3
0.717	0.098	Dai et al., 2016	Measurement of RNA to Protein ratio	Data taken from Table S3
0.744	0.106	Dai et al., 2016	Measurement of RNA to Protein ratio	Data taken from Table S3
0.918	0.115	Dai et al., 2016	Measurement of RNA to Protein ratio	Data taken from Table S3
0.945	0.124	Dai et al., 2016	Measurement of RNA to Protein ratio	Data taken from Table S3
0.993	0.121	Dai et al., 2016	Measurement of RNA to Protein ratio	Data taken from Table S3
0.975	0.134	Dai et al., 2016	Measurement of RNA to Protein ratio	Data taken from Table S3
1.098	0.139	Dai et al., 2016	Measurement of RNA to Protein ratio	Data taken from Table S3
1.162	0.150	Dai et al., 2016	Measurement of RNA to Protein ratio	Data taken from Table S3
1.268	0.165	Dai et al., 2016	Measurement of RNA to Protein ratio	Data taken from Table S3
1.567	0.201	Dai et al., 2016	Measurement of RNA to Protein ratio	Data taken from Table S3
1.795	0.218	Dai et al., 2016	Measurement of RNA to Protein ratio	Data taken from Table S3
0.420	0.091	Bremer & Dennis, 2008	Measurement of RNA to Protein ratio	Calculated from RNA/Protein ratio assuming 0.86 µg rRNA/1µg RNA and 0.53 µg ribosomal protein per 1µg rRNA
0.690	0.103	Bremer & Dennis, 2008	Measurement of RNA to Protein ratio	Calculated from RNA/Protein ratio assuming 0.86 µg rRNA/1µg RNA and 0.53 µg ribosomal protein per 1µg rRNA
1.040	0.151	Bremer & Dennis, 2008	Measurement of RNA to Protein ratio	Calculated from RNA/Protein ratio assuming 0.86 µg rRNA/1µg RNA and 0.53 µg ribosomal protein per 1µg rRNA
1.390	0.178	Bremer & Dennis, 2008	Measurement of RNA to Protein ratio	Calculated from RNA/Protein ratio assuming 0.86 µg rRNA/1µg RNA and 0.53 µg ribosomal protein per 1µg rRNA
1.730	0.215	Bremer & Dennis, 2008	Measurement of RNA to Protein ratio	Calculated from RNA/Protein ratio assuming 0.86 µg rRNA/1µg RNA and 0.53 µg ribosomal protein per 1µg rRNA
0.380	0.086	Forchhammer & Lindahl, 1971	Measurement of RNA to Protein ratio	Calculated from RNA/Protein ratio assuming 0.86 µg rRNA/1µg RNA and 0.53 µg ribosomal protein per 1µg rRNA
0.600	0.102	Forchhammer & Lindahl, 1971	Measurement of RNA to Protein ratio	Calculated from RNA/Protein ratio assuming 0.86 µg rRNA/1µg RNA and 0.53 µg ribosomal protein per 1µg rRNA
1.040	0.134	Forchhammer & Lindahl, 1971	Measurement of RNA to Protein ratio	Calculated from RNA/Protein ratio assuming 0.86 µg rRNA/1µg RNA and 0.53 µg ribosomal protein per 1µg rRNA
1.460	0.192	Forchhammer & Lindahl, 1971	Measurement of RNA to Protein ratio	Calculated from RNA/Protein ratio assuming 0.86 µg rRNA/1µg RNA and 0.53 µg ribosomal protein per 1µg rRNA
1.730	0.214	Forchhammer & Lindahl, 1971	Measurement of RNA to Protein ratio	Calculated from RNA/Protein ratio assuming 0.86 µg rRNA/1µg RNA and 0.53 µg ribosomal protein per 1µg rRNA
0.400	0.081	Scott et al., 2010	Measurement of RNA to Protein ratio	Calculated from RNA/Protein ratio assuming 0.86 µg rRNA/1µg RNA and 0.53 µg ribosomal protein per 1µg rRNA
0.570	0.105	Scott et al., 2010	Measurement of RNA to Protein ratio	Calculated from RNA/Protein ratio assuming 0.86 µg rRNA/1µg RNA and 0.53 µg ribosomal protein per 1µg rRNA
0.710	0.101	Scott et al., 2010	Measurement of RNA to Protein ratio	Calculated from RNA/Protein ratio assuming 0.86 µg rRNA/1µg RNA and 0.53 µg ribosomal protein per 1µg rRNA
1.000	0.131	Scott et al., 2010	Measurement of RNA to Protein ratio	Calculated from RNA/Protein ratio assuming 0.86 µg rRNA/1µg RNA and 0.53 µg ribosomal protein per 1µg rRNA
1.310	0.189	Scott et al., 2010	Measurement of RNA to Protein ratio	Calculated from RNA/Protein ratio assuming 0.86 µg rRNA/1µg RNA and 0.53 µg ribosomal protein per 1µg rRNA
1.580	0.212	Scott et al., 2010	Measurement of RNA to Protein ratio	Calculated from RNA/Protein ratio assuming 0.86 µg rRNA/1µg RNA and 0.53 µg ribosomal protein per 1µg rRNA
0.409	0.077	Brunschede et al., 1977	Measurement of RNA to Protein Ratio	Data recorded from Table 1, using conversion factor described in text. Mass fraction computed assuming conversion factor of RNA/protein * 0.4558 = mass fraction.
0.409	0.086	Brunschede et al., 1977	Measurement of RNA to Protein Ratio	Data recorded from Table 1, using conversion factor described in text. Mass fraction computed assuming conversion factor of RNA/protein * 0.4558 = mass fraction.
0.492	0.095	Brunschede et al., 1977	Measurement of RNA to Protein Ratio	Data recorded from Table 1, using conversion factor described in text. Mass fraction computed assuming conversion factor of RNA/protein * 0.4558 = mass fraction.
0.492	0.100	Brunschede et al., 1977	Measurement of RNA to Protein Ratio	Data recorded from Table 1, using conversion factor described in text. Mass fraction computed assuming conversion factor of RNA/protein * 0.4558 = mass fraction.
0.513	0.067	Brunschede et al., 1977	Measurement of RNA to Protein Ratio	Data recorded from Table 1, using conversion factor described in text. Mass fraction computed assuming conversion factor of RNA/protein * 0.4558 = mass fraction.
0.478	0.077	Brunschede et al., 1977	Measurement of RNA to Protein Ratio	Data recorded from Table 1, using conversion factor described in text. Mass fraction computed assuming conversion factor of RNA/protein * 0.4558 = mass fraction.
0.478	0.081	Brunschede et al., 1977	Measurement of RNA to Protein Ratio	Data recorded from Table 1, using conversion factor described in text. Mass fraction computed assuming conversion factor of RNA/protein * 0.4558 = mass fraction.
0.679	0.048	Brunschede et al., 1977	Measurement of RNA to Protein Ratio	Data recorded from Table 1, using conversion factor described in text. Mass fraction computed assuming conversion factor of RNA/protein * 0.4558 = mass fraction.
0.866	0.123	Brunschede et al., 1977	Measurement of RNA to Protein Ratio	Data recorded from Table 1, using conversion factor described in text. Mass fraction computed assuming conversion factor of RNA/protein * 0.4558 = mass fraction.
0.866	0.135	Brunschede et al., 1977	Measurement of RNA to Protein Ratio	Data recorded from Table 1, using conversion factor described in text. Mass fraction computed assuming conversion factor of RNA/protein * 0.4558 = mass fraction.
0.866	0.137	Brunschede et al., 1977	Measurement of RNA to Protein Ratio	Data recorded from Table 1, using conversion factor described in text. Mass fraction computed assuming conversion factor of RNA/protein * 0.4558 = mass fraction.
0.943	0.149	Brunschede et al., 1977	Measurement of RNA to Protein Ratio	Data recorded from Table 1, using conversion factor described in text. Mass fraction computed assuming conversion factor of RNA/protein * 0.4558 = mass fraction.
0.943	0.163	Brunschede et al., 1977	Measurement of RNA to Protein Ratio	Data recorded from Table 1, using conversion factor described in text. Mass fraction computed assuming conversion factor of RNA/protein * 0.4558 = mass fraction.
1.428	0.196	Brunschede et al., 1977	Measurement of RNA to Protein Ratio	Data recorded from Table 1, using conversion factor described in text. Mass fraction computed assuming conversion factor of RNA/protein * 0.4558 = mass fraction.
1.428	0.191	Brunschede et al., 1977	Measurement of RNA to Protein Ratio	Data recorded from Table 1, using conversion factor described in text. Mass fraction computed assuming conversion factor of RNA/protein * 0.4558 = mass fraction.
0.040	0.044	Wu et al., 2021	Measurement of RNA to Protein Ratio	Data digitized from Fig. 3 C and converted to Ribosomal mass fraction
0.135	0.054	Wu et al., 2021	Measurement of RNA to Protein Ratio	Data digitized from Fig. 3 C and converted to Ribosomal mass fraction
0.204	0.059	Wu et al., 2021	Measurement of RNA to Protein Ratio	Data digitized from Fig. 3 C and converted to Ribosomal mass fraction
0.232	0.061	Wu et al., 2021	Measurement of RNA to Protein Ratio	Data digitized from Fig. 3 C and converted to Ribosomal mass fraction
0.293	0.067	Wu et al., 2021	Measurement of RNA to Protein Ratio	Data digitized from Fig. 3 C and converted to Ribosomal mass fraction
0.334	0.069	Wu et al., 2021	Measurement of RNA to Protein Ratio	Data digitized from Fig. 3 C and converted to Ribosomal mass fraction
0.341	0.069	Wu et al., 2021	Measurement of RNA to Protein Ratio	Data digitized from Fig. 3 C and converted to Ribosomal mass fraction
0.381	0.073	Wu et al., 2021	Measurement of RNA to Protein Ratio	Data digitized from Fig. 3 C and converted to Ribosomal mass fraction
0.412	0.079	Wu et al., 2021	Measurement of RNA to Protein Ratio	Data digitized from Fig. 3 C and converted to Ribosomal mass fraction
0.462	0.079	Wu et al., 2021	Measurement of RNA to Protein Ratio	Data digitized from Fig. 3 C and converted to Ribosomal mass fraction
0.502	0.084	Wu et al., 2021	Measurement of RNA to Protein Ratio	Data digitized from Fig. 3 C and converted to Ribosomal mass fraction
0.551	0.088	Wu et al., 2021	Measurement of RNA to Protein Ratio	Data digitized from Fig. 3 C and converted to Ribosomal mass fraction
0.691	0.100	Wu et al., 2021	Measurement of RNA to Protein Ratio	Data digitized from Fig. 3 C and converted to Ribosomal mass fraction
0.720	0.099	Wu et al., 2021	Measurement of RNA to Protein Ratio	Data digitized from Fig. 3 C and converted to Ribosomal mass fraction
0.701	0.104	Wu et al., 2021	Measurement of RNA to Protein Ratio	Data digitized from Fig. 3 C and converted to Ribosomal mass fraction
0.691	0.104	Wu et al., 2021	Measurement of RNA to Protein Ratio	Data digitized from Fig. 3 C and converted to Ribosomal mass fraction
0.750	0.107	Wu et al., 2021	Measurement of RNA to Protein Ratio	Data digitized from Fig. 3 C and converted to Ribosomal mass fraction
0.918	0.116	Wu et al., 2021	Measurement of RNA to Protein Ratio	Data digitized from Fig. 3 C and converted to Ribosomal mass fraction
0.949	0.125	Wu et al., 2021	Measurement of RNA to Protein Ratio	Data digitized from Fig. 3 C and converted to Ribosomal mass fraction
0.989	0.123	Wu et al., 2021	Measurement of RNA to Protein Ratio	Data digitized from Fig. 3 C and converted to Ribosomal mass fraction
0.980	0.135	Wu et al., 2021	Measurement of RNA to Protein Ratio	Data digitized from Fig. 3 C and converted to Ribosomal mass fraction
0.13	0.063	Erickson et al., 2017	Measurement of RNA to Protein Ratio using their conversion factor	Taken from table in FigS1 (panel H)
0.19	0.072	Erickson et al., 2017	Measurement of RNA to Protein Ratio using their conversion factor	Taken from table in FigS1 (panel H)
0.61	0.097	Erickson et al., 2017	Measurement of RNA to Protein Ratio using their conversion factor	Taken from table in FigS1 (panel H)
0.91	0.139	Erickson et al., 2017	Measurement of RNA to Protein Ratio using their conversion factor	Taken from table in FigS1 (panel H)
0.91	0.124	Erickson et al., 2017	Measurement of RNA to Protein Ratio using their conversion factor	Taken from table in FigS1 (panel H)
0.62	0.096	Erickson et al., 2017	Measurement of RNA to Protein Ratio using their conversion factor	Taken from table in FigS1 (panel H)
0.79	0.133	Erickson et al., 2017	Measurement of RNA to Protein Ratio using their conversion factor	Taken from table in FigS1 (panel H)
1.04	0.142	Erickson et al., 2017	Measurement of RNA to Protein Ratio using their conversion factor	Taken from table in FigS1 (panel H)
0.93	0.138	Erickson et al., 2017	Measurement of RNA to Protein Ratio using their conversion factor	Taken from table in FigS1 (panel H)
0.71	0.113	Erickson et al., 2017	Measurement of RNA to Protein Ratio using their conversion factor	Taken from table in FigS1 (panel H)
0.45	0.089	Erickson et al., 2017	Measurement of RNA to Protein Ratio using their conversion factor	Taken from table in FigS1 (panel H)
0.98	0.140	Erickson et al., 2017	Measurement of RNA to Protein Ratio using their conversion factor	Taken from table in FigS1 (panel H)
0.06	0.060	Erickson et al., 2017	Measurement of RNA to Protein Ratio using their conversion factor	Taken from table in FigS1 (panel I). This are different strains than panel H
0.16	0.065	Erickson et al., 2017	Measurement of RNA to Protein Ratio using their conversion factor	Taken from table in FigS1 (panel I). This are different strains than panel H
0.25	0.073	Erickson et al., 2017	Measurement of RNA to Protein Ratio using their conversion factor	Taken from table in FigS1 (panel I). This are different strains than panel H
0.40	0.084	Erickson et al., 2017	Measurement of RNA to Protein Ratio using their conversion factor	Taken from table in FigS1 (panel I). This are different strains than panel H
0.29	0.074	Erickson et al., 2017	Measurement of RNA to Protein Ratio using their conversion factor	Taken from table in FigS1 (panel I). This are different strains than panel H
0.43	0.086	Erickson et al., 2017	Measurement of RNA to Protein Ratio using their conversion factor	Taken from table in FigS1 (panel I). This are different strains than panel H
0.55	0.103	Erickson et al., 2017	Measurement of RNA to Protein Ratio using their conversion factor	Taken from table in FigS1 (panel I). This are different strains than panel H
0.31	0.100	Erickson et al., 2017	Measurement of RNA to Protein Ratio using their conversion factor	Taken from table in FigS1 (panel I). This are different strains than panel H
0.79	0.129	Erickson et al., 2017	Measurement of RNA to Protein Ratio using their conversion factor	Taken from table in FigS1 (panel I). This are different strains than panel H
0.18	0.059	Erickson et al., 2017	Measurement of RNA to Protein Ratio using their conversion factor	Taken from table in FigS1 (panel I). This are different strains than panel H
0.32	0.078	Erickson et al., 2017	Measurement of RNA to Protein Ratio using their conversion factor	Taken from table in FigS1 (panel I). This are different strains than panel H
0.38	0.086	Erickson et al., 2017	Measurement of RNA to Protein Ratio using their conversion factor	Taken from table in FigS1 (panel I). This are different strains than panel H
0.57	0.105	Erickson et al., 2017	Measurement of RNA to Protein Ratio using their conversion factor	Taken from table in FigS1 (panel I). This are different strains than panel H
0.091	0.0726436860017846	Li et al., 2018	Measurement of RNA to Protein Ratio taken from supplemental table 2, converted to mass fraction using a conversion factor
0.3	0.0789628267356524	Li et al., 2018	Measurement of RNA to Protein Ratio taken from supplemental table 2, converted to mass fraction using a conversion factor
0.47	0.100846724966711	Li et al., 2018	Measurement of RNA to Protein Ratio taken from supplemental table 2, converted to mass fraction using a conversion factor
0.62	0.113372083792723	Li et al., 2018	Measurement of RNA to Protein Ratio taken from supplemental table 2, converted to mass fraction using a conversion factor
0.091	0.071924986072423	Li et al., 2018	Measurement of RNA to Protein Ratio taken from supplemental table 2, converted to mass fraction using a conversion factor
0.3	0.0876673446465888	Li et al., 2018	Measurement of RNA to Protein Ratio taken from supplemental table 2, converted to mass fraction using a conversion factor
0.44	0.099259010591144	Li et al., 2018	Measurement of RNA to Protein Ratio taken from supplemental table 2, converted to mass fraction using a conversion factor
0.63	0.117855191815857	Li et al., 2018	Measurement of RNA to Protein Ratio taken from supplemental table 2, converted to mass fraction using a conversion factor
1.67	0.253610941282292	Li et al., 2018	Measurement of RNA to Protein Ratio taken from supplemental table 2, converted to mass fraction using a conversion factor
1.1	0.168504155947159	Li et al., 2018	Measurement of RNA to Protein Ratio taken from supplemental table 2, converted to mass fraction using a conversion factor
0.93	0.157110064078685	Li et al., 2018	Measurement of RNA to Protein Ratio taken from supplemental table 2, converted to mass fraction using a conversion factor
0.6	0.120988643656674	Li et al., 2018	Measurement of RNA to Protein Ratio taken from supplemental table 2, converted to mass fraction using a conversion factor
0.56	0.119322884130064	Li et al., 2018	Measurement of RNA to Protein Ratio taken from supplemental table 2, converted to mass fraction using a conversion factor
0.44	0.085160400210475	Li et al., 2018	Measurement of RNA to Protein Ratio taken from supplemental table 2, converted to mass fraction using a conversion factor
0.2306	0.0781770333490095	Li et al., 2018	Measurement of RNA to Protein Ratio taken from supplemental table 2, converted to mass fraction using a conversion factor
0.06716417910447760	0.05958853211009150	Mori et al., 2017	Measurement of RNA to Protein Ratio converted to mass fraction using a conversion factor	Data digitized from Fig S2A.
0.19402985074626900	0.05854311926605500	Mori et al., 2017	Measurement of RNA to Protein Ratio converted to mass fraction using a conversion factor	Data digitized from Fig S2A.
0.12686567164179100	0.06272477064220200	Mori et al., 2017	Measurement of RNA to Protein Ratio converted to mass fraction using a conversion factor	Data digitized from Fig S2A.
0.14925373134328300	0.06481559633027510	Mori et al., 2017	Measurement of RNA to Protein Ratio converted to mass fraction using a conversion factor	Data digitized from Fig S2A.
0.19402985074626900	0.07213348623853210	Mori et al., 2017	Measurement of RNA to Protein Ratio converted to mass fraction using a conversion factor	Data digitized from Fig S2A.
0.25373134328358200	0.07422431192660560	Mori et al., 2017	Measurement of RNA to Protein Ratio converted to mass fraction using a conversion factor	Data digitized from Fig S2A.
0.2910447761194030	0.07317889908256870	Mori et al., 2017	Measurement of RNA to Protein Ratio converted to mass fraction using a conversion factor	Data digitized from Fig S2A.
0.32835820895522400	0.07840596330275220	Mori et al., 2017	Measurement of RNA to Protein Ratio converted to mass fraction using a conversion factor	Data digitized from Fig S2A.
0.3656716417910450	0.08676926605504580	Mori et al., 2017	Measurement of RNA to Protein Ratio converted to mass fraction using a conversion factor	Data digitized from Fig S2A.
0.3955223880597010	0.0836330275229357	Mori et al., 2017	Measurement of RNA to Protein Ratio converted to mass fraction using a conversion factor	Data digitized from Fig S2A.
0.4402985074626870	0.08676926605504580	Mori et al., 2017	Measurement of RNA to Protein Ratio converted to mass fraction using a conversion factor	Data digitized from Fig S2A.
0.4552238805970150	0.08781467889908280	Mori et al., 2017	Measurement of RNA to Protein Ratio converted to mass fraction using a conversion factor	Data digitized from Fig S2A.
0.5522388059701490	0.10245045871559600	Mori et al., 2017	Measurement of RNA to Protein Ratio converted to mass fraction using a conversion factor	Data digitized from Fig S2A.
0.5746268656716420	0.10349587155963300	Mori et al., 2017	Measurement of RNA to Protein Ratio converted to mass fraction using a conversion factor	Data digitized from Fig S2A.
0.6194029850746270	0.0993142201834864	Mori et al., 2017	Measurement of RNA to Protein Ratio converted to mass fraction using a conversion factor	Data digitized from Fig S2A.
0.6194029850746270	0.09617798165137630	Mori et al., 2017	Measurement of RNA to Protein Ratio converted to mass fraction using a conversion factor	Data digitized from Fig S2A.
0.716417910447761	0.11290458715596300	Mori et al., 2017	Measurement of RNA to Protein Ratio converted to mass fraction using a conversion factor	Data digitized from Fig S2A.
0.7985074626865670	0.1285857798165140	Mori et al., 2017	Measurement of RNA to Protein Ratio converted to mass fraction using a conversion factor	Data digitized from Fig S2A.
0.7910447761194030	0.13172201834862400	Mori et al., 2017	Measurement of RNA to Protein Ratio converted to mass fraction using a conversion factor	Data digitized from Fig S2A.
0.9029850746268660	0.1379944954128440	Mori et al., 2017	Measurement of RNA to Protein Ratio converted to mass fraction using a conversion factor	Data digitized from Fig S2A.
0.9253731343283580	0.1379944954128440	Mori et al., 2017	Measurement of RNA to Protein Ratio converted to mass fraction using a conversion factor	Data digitized from Fig S2A.
0.9104477611940300	0.12440412844036700	Mori et al., 2017	Measurement of RNA to Protein Ratio converted to mass fraction using a conversion factor	Data digitized from Fig S2A.
0.9850746268656720	0.1379944954128440	Mori et al., 2017	Measurement of RNA to Protein Ratio converted to mass fraction using a conversion factor	Data digitized from Fig S2A.
1.0447761194029800	0.14113073394495400	Mori et al., 2017	Measurement of RNA to Protein Ratio converted to mass fraction using a conversion factor	Data digitized from Fig S2A.
0.44	0.077486	You et al., 2013	Measurement of RNA to Protein Ratio using their conversion factor	Data taken from Table S10
0.41	0.077486	You et al., 2013	Measurement of RNA to Protein Ratio using their conversion factor	Data taken from Table S10
0.62	0.104834	You et al., 2013	Measurement of RNA to Protein Ratio using their conversion factor	Data taken from Table S10
0.64	0.104834	You et al., 2013	Measurement of RNA to Protein Ratio using their conversion factor	Data taken from Table S10
0.87	0.127624	You et al., 2013	Measurement of RNA to Protein Ratio using their conversion factor	Data taken from Table S10
1.00	0.1381298	You et al., 2013	Measurement of RNA to Protein Ratio using their conversion factor	Data taken from Table S10
1.84	0.211967781155015	Basan et al., 2015	Measurement of RNA to Protein Ratio using their conversion factor	Data taken from Table S4
1.27	0.165353312302839	Basan et al., 2015	Measurement of RNA to Protein Ratio using their conversion factor	Data taken from Table S4
0.98	0.134002462462462	Basan et al., 2015	Measurement of RNA to Protein Ratio using their conversion factor	Data taken from Table S4
0.7	0.107080901408451	Basan et al., 2015	Measurement of RNA to Protein Ratio using their conversion factor	Data taken from Table S4
0.45	0.0777753968253968	Basan et al., 2015	Measurement of RNA to Protein Ratio using their conversion factor	Data taken from Table S4
0.42	0.0770546803069054	Basan et al., 2015	Measurement of RNA to Protein Ratio using their conversion factor	Data taken from Table S4
0.4197633609961770	0.07785785595955	Zhu & Dai, 2019	Measurement of RNA to Protein ratio	Data digitized from Fig 2D
0.4608100999473960	0.0806663686826258	Zhu & Dai, 2019	Measurement of RNA to Protein ratio	Data digitized from Fig 2D
0.690806880903217	0.102401566025737	Zhu & Dai, 2019	Measurement of RNA to Protein ratio	Data digitized from Fig 2D
0.9742869032009860	0.133236516366092	Zhu & Dai, 2019	Measurement of RNA to Protein ratio	Data digitized from Fig 2D
1.3643565444738400	0.165505783601718	Zhu & Dai, 2019	Measurement of RNA to Protein ratio	Data digitized from Fig 2D
1.828589823109600	0.215264555654133	Zhu & Dai, 2019	Measurement of RNA to Protein ratio	Data digitized from Fig 2D
2.0023	0.196499938	Si et al., 2017	Measurement of RNA to Protein ratio	Data calculated from supplemental data file, considering only NCM3722 and MG1655 nutrient limitation and 0 antibiotics
1.9522	0.220101262	Si et al., 2017	Measurement of RNA to Protein ratio	Data calculated from supplemental data file, considering only NCM3722 and MG1655 nutrient limitation and 0 antibiotics
0.75155	0.12657566	Si et al., 2017	Measurement of RNA to Protein ratio	Data calculated from supplemental data file, considering only NCM3722 and MG1655 nutrient limitation and 0 antibiotics
1.0344	0.130741672	Si et al., 2017	Measurement of RNA to Protein ratio	Data calculated from supplemental data file, considering only NCM3722 and MG1655 nutrient limitation and 0 antibiotics
0.56926	0.116620988	Si et al., 2017	Measurement of RNA to Protein ratio	Data calculated from supplemental data file, considering only NCM3722 and MG1655 nutrient limitation and 0 antibiotics
0.75501	0.087891914	Si et al., 2017	Measurement of RNA to Protein ratio	Data calculated from supplemental data file, considering only NCM3722 and MG1655 nutrient limitation and 0 antibiotics
1.8144	0.19959482	Si et al., 2017	Measurement of RNA to Protein ratio	Data calculated from supplemental data file, considering only NCM3722 and MG1655 nutrient limitation and 0 antibiotics
1.8154	0.215329036	Si et al., 2017	Measurement of RNA to Protein ratio	Data calculated from supplemental data file, considering only NCM3722 and MG1655 nutrient limitation and 0 antibiotics
1.4587	0.163422532	Si et al., 2017	Measurement of RNA to Protein ratio	Data calculated from supplemental data file, considering only NCM3722 and MG1655 nutrient limitation and 0 antibiotics
1.2686	0.139570518	Si et al., 2017	Measurement of RNA to Protein ratio	Data calculated from supplemental data file, considering only NCM3722 and MG1655 nutrient limitation and 0 antibiotics
0.88083	0.121876362	Si et al., 2017	Measurement of RNA to Protein ratio	Data calculated from supplemental data file, considering only NCM3722 and MG1655 nutrient limitation and 0 antibiotics
0.65611	0.097582222	Si et al., 2017	Measurement of RNA to Protein ratio	Data calculated from supplemental data file, considering only NCM3722 and MG1655 nutrient limitation and 0 antibiotics
0.59741	0.0900205	Si et al., 2017	Measurement of RNA to Protein ratio	Data calculated from supplemental data file, considering only NCM3722 and MG1655 nutrient limitation and 0 antibiotics
2.1133	0.169749036	Si et al., 2017	Measurement of RNA to Protein ratio	Data calculated from supplemental data file, considering only NCM3722 and MG1655 nutrient limitation and 0 antibiotics
1.8779	0.157004868	Si et al., 2017	Measurement of RNA to Protein ratio	Data calculated from supplemental data file, considering only NCM3722 and MG1655 nutrient limitation and 0 antibiotics
1.4313	0.130012392	Si et al., 2017	Measurement of RNA to Protein ratio	Data calculated from supplemental data file, considering only NCM3722 and MG1655 nutrient limitation and 0 antibiotics
1.2541	0.125609364	Si et al., 2017	Measurement of RNA to Protein ratio	Data calculated from supplemental data file, considering only NCM3722 and MG1655 nutrient limitation and 0 antibiotics
1.0632	0.115372096	Si et al., 2017	Measurement of RNA to Protein ratio	Data calculated from supplemental data file, considering only NCM3722 and MG1655 nutrient limitation and 0 antibiotics
0.75406	0.094596732	Si et al., 2017	Measurement of RNA to Protein ratio	Data calculated from supplemental data file, considering only NCM3722 and MG1655 nutrient limitation and 0 antibiotics
0.78904	0.104045466	Si et al., 2017	Measurement of RNA to Protein ratio	Data calculated from supplemental data file, considering only NCM3722 and MG1655 nutrient limitation and 0 antibiotics
1.8088	0.21452227	Si et al., 2017	Measurement of RNA to Protein ratio	Data calculated from supplemental data file, considering only NCM3722 and MG1655 nutrient limitation and 0 antibiotics
1.5663	0.172319748	Si et al., 2017	Measurement of RNA to Protein ratio	Data calculated from supplemental data file, considering only NCM3722 and MG1655 nutrient limitation and 0 antibiotics
1.1517	0.135240418	Si et al., 2017	Measurement of RNA to Protein ratio	Data calculated from supplemental data file, considering only NCM3722 and MG1655 nutrient limitation and 0 antibiotics
1.1026	0.115162428	Si et al., 2017	Measurement of RNA to Protein ratio	Data calculated from supplemental data file, considering only NCM3722 and MG1655 nutrient limitation and 0 antibiotics
0.62786	0.11590994	Si et al., 2017	Measurement of RNA to Protein ratio	Data calculated from supplemental data file, considering only NCM3722 and MG1655 nutrient limitation and 0 antibiotics
1.7342	0.176276092	Si et al., 2017	Measurement of RNA to Protein ratio	Data calculated from supplemental data file, considering only NCM3722 and MG1655 nutrient limitation and 0 antibiotics
1.1273	0.122195422	Si et al., 2017	Measurement of RNA to Protein ratio	Data calculated from supplemental data file, considering only NCM3722 and MG1655 nutrient limitation and 0 antibiotics
0.83602	0.133244014	Si et al., 2017	Measurement of RNA to Protein ratio	Data calculated from supplemental data file, considering only NCM3722 and MG1655 nutrient limitation and 0 antibiotics
0.70943	0.09574079	Si et al., 2017	Measurement of RNA to Protein ratio	Data calculated from supplemental data file, considering only NCM3722 and MG1655 nutrient limitation and 0 antibiotics
0.39136	0.070092924	Si et al., 2017	Measurement of RNA to Protein ratio	Data calculated from supplemental data file, considering only NCM3722 and MG1655 nutrient limitation and 0 antibiotics
1.7854	0.20287658	Si et al., 2017	Measurement of RNA to Protein ratio	Data calculated from supplemental data file, considering only NCM3722 and MG1655 nutrient limitation and 0 antibiotics
1.0818	0.146890666	Si et al., 2017	Measurement of RNA to Protein ratio	Data calculated from supplemental data file, considering only NCM3722 and MG1655 nutrient limitation and 0 antibiotics
0.83287	0.13117924	Si et al., 2017	Measurement of RNA to Protein ratio	Data calculated from supplemental data file, considering only NCM3722 and MG1655 nutrient limitation and 0 antibiotics
0.73618	0.073215154	Si et al., 2017	Measurement of RNA to Protein ratio	Data calculated from supplemental data file, considering only NCM3722 and MG1655 nutrient limitation and 0 antibiotics
0.69244	0.099428212	Si et al., 2017	Measurement of RNA to Protein ratio	Data calculated from supplemental data file, considering only NCM3722 and MG1655 nutrient limitation and 0 antibiotics
0.31271	0.067472074	Si et al., 2017	Measurement of RNA to Protein ratio	Data calculated from supplemental data file, considering only NCM3722 and MG1655 nutrient limitation and 0 antibiotics
1.7662	0.20606718	Si et al., 2017	Measurement of RNA to Protein ratio	Data calculated from supplemental data file, considering only NCM3722 and MG1655 nutrient limitation and 0 antibiotics
1.0637	0.13029043	Si et al., 2017	Measurement of RNA to Protein ratio	Data calculated from supplemental data file, considering only NCM3722 and MG1655 nutrient limitation and 0 antibiotics
0.80028	0.13022206	Si et al., 2017	Measurement of RNA to Protein ratio	Data calculated from supplemental data file, considering only NCM3722 and MG1655 nutrient limitation and 0 antibiotics
0.82842	0.13101971	Si et al., 2017	Measurement of RNA to Protein ratio	Data calculated from supplemental data file, considering only NCM3722 and MG1655 nutrient limitation and 0 antibiotics
0.70978	0.068556878	Si et al., 2017	Measurement of RNA to Protein ratio	Data calculated from supplemental data file, considering only NCM3722 and MG1655 nutrient limitation and 0 antibiotics
0.66856	0.099268682	Si et al., 2017	Measurement of RNA to Protein ratio	Data calculated from supplemental data file, considering only NCM3722 and MG1655 nutrient limitation and 0 antibiotics
0.4499	0.075421226	Si et al., 2017	Measurement of RNA to Protein ratio	Data calculated from supplemental data file, considering only NCM3722 and MG1655 nutrient limitation and 0 antibiotics
1.6541	0.158445196	Si et al., 2017	Measurement of RNA to Protein ratio	Data calculated from supplemental data file, considering only NCM3722 and MG1655 nutrient limitation and 0 antibiotics
1.4993	0.158832626	Si et al., 2017	Measurement of RNA to Protein ratio	Data calculated from supplemental data file, considering only NCM3722 and MG1655 nutrient limitation and 0 antibiotics
0.72045	0.124556466	Si et al., 2017	Measurement of RNA to Protein ratio	Data calculated from supplemental data file, considering only NCM3722 and MG1655 nutrient limitation and 0 antibiotics
1.0654	0.110545174	Si et al., 2017	Measurement of RNA to Protein ratio	Data calculated from supplemental data file, considering only NCM3722 and MG1655 nutrient limitation and 0 antibiotics
0.82866	0.048232756	Si et al., 2017	Measurement of RNA to Protein ratio	Data calculated from supplemental data file, considering only NCM3722 and MG1655 nutrient limitation and 0 antibiotics
0.75346	0.07668835	Si et al., 2017	Measurement of RNA to Protein ratio	Data calculated from supplemental data file, considering only NCM3722 and MG1655 nutrient limitation and 0 antibiotics
0.41312	0.062567666	Si et al., 2017	Measurement of RNA to Protein ratio	Data calculated from supplemental data file, considering only NCM3722 and MG1655 nutrient limitation and 0 antibiotics
1.7479	0.227895442	Si et al., 2017	Measurement of RNA to Protein ratio	Data calculated from supplemental data file, considering only NCM3722 and MG1655 nutrient limitation and 0 antibiotics
1.4982	0.191394978	Si et al., 2017	Measurement of RNA to Protein ratio	Data calculated from supplemental data file, considering only NCM3722 and MG1655 nutrient limitation and 0 antibiotics
1.3375	0.171704418	Si et al., 2017	Measurement of RNA to Protein ratio	Data calculated from supplemental data file, considering only NCM3722 and MG1655 nutrient limitation and 0 antibiotics
1.0379	0.16821299	Si et al., 2017	Measurement of RNA to Protein ratio	Data calculated from supplemental data file, considering only NCM3722 and MG1655 nutrient limitation and 0 antibiotics
0.79254	0.124629394	Si et al., 2017	Measurement of RNA to Protein ratio	Data calculated from supplemental data file, considering only NCM3722 and MG1655 nutrient limitation and 0 antibiotics
0.75655	0.125089752	Si et al., 2017	Measurement of RNA to Protein ratio	Data calculated from supplemental data file, considering only NCM3722 and MG1655 nutrient limitation and 0 antibiotics
0.34007	0.089122574	Si et al., 2017	Measurement of RNA to Protein ratio	Data calculated from supplemental data file, considering only NCM3722 and MG1655 nutrient limitation and 0 antibiotics
1.1988	0.125180912	Si et al., 2017	Measurement of RNA to Protein ratio	Data calculated from supplemental data file, considering only NCM3722 and MG1655 nutrient limitation and 0 antibiotics
1.1731	0.121680368	Si et al., 2017	Measurement of RNA to Protein ratio	Data calculated from supplemental data file, considering only NCM3722 and MG1655 nutrient limitation and 0 antibiotics
1.2352	0.126110744	Si et al., 2017	Measurement of RNA to Protein ratio	Data calculated from supplemental data file, considering only NCM3722 and MG1655 nutrient limitation and 0 antibiotics
1.7573	0.190323848	Si et al., 2017	Measurement of RNA to Protein ratio	Data calculated from supplemental data file, considering only NCM3722 and MG1655 nutrient limitation and 0 antibiotics
1.7095	0.210401838	Si et al., 2017	Measurement of RNA to Protein ratio	Data calculated from supplemental data file, considering only NCM3722 and MG1655 nutrient limitation and 0 antibiotics
1.9438	0.195916514	Si et al., 2017	Measurement of RNA to Protein ratio	Data calculated from supplemental data file, considering only NCM3722 and MG1655 nutrient limitation and 0 antibiotics
1.7703	0.20495047	Si et al., 2017	Measurement of RNA to Protein ratio	Data calculated from supplemental data file, considering only NCM3722 and MG1655 nutrient limitation and 0 antibiotics
1.7077	0.17258867	Si et al., 2017	Measurement of RNA to Protein ratio	Data calculated from supplemental data file, considering only NCM3722 and MG1655 nutrient limitation and 0 antibiotics
1.3168	0.147592598	Si et al., 2017	Measurement of RNA to Protein ratio	Data calculated from supplemental data file, considering only NCM3722 and MG1655 nutrient limitation and 0 antibiotics
1.4475	0.170337018	Si et al., 2017	Measurement of RNA to Protein ratio	Data calculated from supplemental data file, considering only NCM3722 and MG1655 nutrient limitation and 0 antibiotics
1.3448	0.201240258	Si et al., 2017	Measurement of RNA to Protein ratio	Data calculated from supplemental data file, considering only NCM3722 and MG1655 nutrient limitation and 0 antibiotics
1.503	0.171617816	Si et al., 2017	Measurement of RNA to Protein ratio	Data calculated from supplemental data file, considering only NCM3722 and MG1655 nutrient limitation and 0 antibiotics
1.5053	0.183441268	Si et al., 2017	Measurement of RNA to Protein ratio	Data calculated from supplemental data file, considering only NCM3722 and MG1655 nutrient limitation and 0 antibiotics
1.2583	0.19002302	Si et al., 2017	Measurement of RNA to Protein ratio	Data calculated from supplemental data file, considering only NCM3722 and MG1655 nutrient limitation and 0 antibiotics
1.3125	0.144278932	Si et al., 2017	Measurement of RNA to Protein ratio	Data calculated from supplemental data file, considering only NCM3722 and MG1655 nutrient limitation and 0 antibiotics
1.1146	0.133353406	Si et al., 2017	Measurement of RNA to Protein ratio	Data calculated from supplemental data file, considering only NCM3722 and MG1655 nutrient limitation and 0 antibiotics
1.1547	0.1424375	Si et al., 2017	Measurement of RNA to Protein ratio	Data calculated from supplemental data file, considering only NCM3722 and MG1655 nutrient limitation and 0 antibiotics
1.0276	0.127095272	Si et al., 2017	Measurement of RNA to Protein ratio	Data calculated from supplemental data file, considering only NCM3722 and MG1655 nutrient limitation and 0 antibiotics
1.058	0.110814096	Si et al., 2017	Measurement of RNA to Protein ratio	Data calculated from supplemental data file, considering only NCM3722 and MG1655 nutrient limitation and 0 antibiotics
1.1048	0.147191494	Si et al., 2017	Measurement of RNA to Protein ratio	Data calculated from supplemental data file, considering only NCM3722 and MG1655 nutrient limitation and 0 antibiotics
1.0261	0.118357586	Si et al., 2017	Measurement of RNA to Protein ratio	Data calculated from supplemental data file, considering only NCM3722 and MG1655 nutrient limitation and 0 antibiotics
0.70007	0.176777472	Si et al., 2017	Measurement of RNA to Protein ratio	Data calculated from supplemental data file, considering only NCM3722 and MG1655 nutrient limitation and 0 antibiotics
0.75945	0.087837218	Si et al., 2017	Measurement of RNA to Protein ratio	Data calculated from supplemental data file, considering only NCM3722 and MG1655 nutrient limitation and 0 antibiotics
0.64728	0.095663304	Si et al., 2017	Measurement of RNA to Protein ratio	Data calculated from supplemental data file, considering only NCM3722 and MG1655 nutrient limitation and 0 antibiotics
0.64552	0.08564482	Si et al., 2017	Measurement of RNA to Protein ratio	Data calculated from supplemental data file, considering only NCM3722 and MG1655 nutrient limitation and 0 antibiotics
0.6694	0.087960284	Si et al., 2017	Measurement of RNA to Protein ratio	Data calculated from supplemental data file, considering only NCM3722 and MG1655 nutrient limitation and 0 antibiotics
0.35841	0.068538646	Si et al., 2017	Measurement of RNA to Protein ratio	Data calculated from supplemental data file, considering only NCM3722 and MG1655 nutrient limitation and 0 antibiotics
1.2071	0.116210768	Si et al., 2017	Measurement of RNA to Protein ratio	Data calculated from supplemental data file, considering only NCM3722 and MG1655 nutrient limitation and 0 antibiotics
0.64317	0.068538646	Si et al., 2017	Measurement of RNA to Protein ratio	Data calculated from supplemental data file, considering only NCM3722 and MG1655 nutrient limitation and 0 antibiotics
1.7284	0.19227923	Si et al., 2017	Measurement of RNA to Protein ratio	Data calculated from supplemental data file, considering only NCM3722 and MG1655 nutrient limitation and 0 antibiotics
1.1884	0.119392252	Si et al., 2017	Measurement of RNA to Protein ratio	Data calculated from supplemental data file, considering only NCM3722 and MG1655 nutrient limitation and 0 antibiotics
