# Supplementary material for: An optimal regulation of fluxes dictates microbial growth in and out of steady state
Source: eLife journal article supplement (doi:10.7554/elife.84878), 2023-03-10
Supplement: supp [file elife-84878-supp-v1.zip › elife_poa_e84878_Figure_1_source_data_2.csv]

#####################################################################################
# Per Ribosome Translation Speeds in E. coli
# =================================================
# Collated measurements of the per ribosome peptide chain elongation rate in E. coli
# and the the corresponding steady-state growth rate. Elongtation rates are
# provided in units of amino acids per second per ribosome. Growth rates are
# provided in inverse hours. The "notes" column provides details regarding where
# the data came from in each source entry.
#####################################################################################
growth_rate_hr	elongation_rate_aa_s	source	notes
1.80	16.7	Dai et al., 2016	Table S1
1.28	16.3	Dai et al., 2016	Table S1
1.12	16.1	Dai et al., 2016	Table S1
0.98	15.9	Dai et al., 2016	Table S1
0.75	14.9	Dai et al., 2016	Table S1
0.69	15.0	Dai et al., 2016	Table S1
0.69	14.7	Dai et al., 2016	Table S1
0.55	13.7	Dai et al., 2016	Table S1
0.50	13.1	Dai et al., 2016	Table S1
0.46	12.6	Dai et al., 2016	Table S1
0.41	13.0	Dai et al., 2016	Table S1
0.34	12.4	Dai et al., 2016	Table S1
0.33	12.0	Dai et al., 2016	Table S1
0.29	12.1	Dai et al., 2016	Table S1
0.23	12.3	Dai et al., 2016	Table S1
0.20	11.6	Dai et al., 2016	Table S1
0.13	10.7	Dai et al., 2016	Table S1
0.04	9.4	Dai et al., 2016	Table S1
1.52	16.2	Dalbow & Young, 1975	Table 2
1.43	16.1	Dalbow & Young, 1975	Table 2
0.90	15.15	Dalbow & Young, 1975	Table 2
0.97	16.5	Dalbow & Young, 1975	Table 2
0.44	13.35	Dalbow & Young, 1975	Table 2
0.43	13.25	Dalbow & Young, 1975	Table 2
1.46	17	Young & Bremer, 1976	Table 1
0.97	17	Young & Bremer, 1976	Table 1
0.49	12	Young & Bremer, 1976	Table 1
1.73	15.9262212268574	Forchhammer & Lindahl, 1971	Value recalculated from data in Table 1, assuming 100% of ribosomes are active
1.46	14.8795594760202	Forchhammer & Lindahl, 1971	Value recalculated from data in Table 1, assuming 100% of ribosomes are active
1.04	15.2005960649111	Forchhammer & Lindahl, 1971	Value recalculated from data in Table 1, assuming 100% of ribosomes are active
0.60	11.6140660920489	Forchhammer & Lindahl, 1971	Value recalculated from data in Table 1, assuming 100% of ribosomes are active
0.38	8.68902448565174	Forchhammer & Lindahl, 1971	Value recalculated from data in Table 1, assuming 100% of ribosomes are active
0.42	9.6	Bremer & Dennis, 2008	Value recalculated from Table 3 assuming all ribosomes are active
0.69	12.8	Bremer & Dennis, 2008	Value recalculated from Table 3 assuming all ribosomes are active
1.04	14.4	Bremer & Dennis, 2008	Value recalculated from Table 3 assuming all ribosomes are active
1.39	16	Bremer & Dennis, 2008	Value recalculated from Table 3 assuming all ribosomes are active
1.73	16.8	Bremer & Dennis, 2008	Value recalculated from Table 3 assuming all ribosomes are active
0.12	12.264591439688700	Wu et al., 2021	Data digitized from Fig. 3E
0.32	12.871595330739300	Wu et al., 2021	Data digitized from Fig. 3E
0.34	13.525291828793800	Wu et al., 2021	Data digitized from Fig. 3E
0.35	13.665369649805400	Wu et al., 2021	Data digitized from Fig. 3E
0.37	14.412451361867700	Wu et al., 2021	Data digitized from Fig. 3E
0.46	13.618677042801600	Wu et al., 2021	Data digitized from Fig. 3E
0.58	15.439688715953300	Wu et al., 2021	Data digitized from Fig. 3E
0.65	15.95330739299610	Wu et al., 2021	Data digitized from Fig. 3E
0.68	15.626459143968900	Wu et al., 2021	Data digitized from Fig. 3E
0.69	15.626459143968900	Wu et al., 2021	Data digitized from Fig. 3E
0.96	16.140077821011700	Wu et al., 2021	Data digitized from Fig. 3E
0.55	15	Kepes & Beguin, 1966	Data taken from Table 1 in Young & Bremer, 1976
0.62	14	Coffman et al., 1971	Data taken from Table 1 in Young & Bremer, 1976
1.52	17	Morris & Hansen, 1973	Data taken from Table 1 in Young & Bremer, 1976
0.48	13	Schleif et al., 1973	Data taken from Table 1 in Young & Bremer, 1976
0.52	14.3	Lacroute & Stent, 1968	Data taken from Table 1 in Young & Bremer, 1976
0.82	14.1	Albertson & Nyström, 1994	Data taken from paragraph 1 on pg 185. Exponential growth rate inferred from data digitized from Fig. 1A
0.83	16	Dennis & Bremer, 1974	Data taken from first paragraph on pg. 418. Values taken as average of reported bounds.
0.46	10.5	Dennis & Bremer, 1974	Data taken from first paragraph on pg. 418. Values taken as average of reported bounds.
0.83	17	Gausing, 1972	Taken from text, pg.539, paragraph 4
0.86	13	Schleif, 1967	Taken from middle of page 53
1.97	15.7	Hernandez & Bremer, 1993	Taken from Table 2.
1.60	15.1	Hernandez & Bremer, 1993	Taken from Table 2.
1.35	15.7	Hernandez & Bremer, 1993	Taken from Table 2.
0.91	15.4	Hernandez & Bremer, 1993	Taken from Table 2.
0.41	12	Hernandez & Bremer, 1993	Taken from text on pg 10859
0.33	11.5	Pedersen, 1984	Taken from values in parentheses in Table 1
0.69	13.6	Pedersen, 1984	Taken from values in parentheses in Table 1
0.99	17	Pedersen, 1984	Taken from values in parentheses in Table 1
