# Supplementary material for: An optimal regulation of fluxes dictates microbial growth in and out of steady state
Source: eLife journal article supplement (doi:10.7554/elife.84878), 2023-03-10

### tRNA balance too low

ppGpp **decreases**  $\phi_{Rb}$   $\rightarrow$  fluxes **increase**  
 ppGpp **increases**  $\phi_{Rb}$   $\rightarrow$  fluxes **decrease**

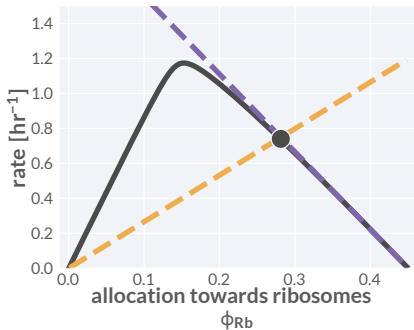

### tRNA balance at optimum

ppGpp **decreases**  $\phi_{Rb}$   $\rightarrow$  fluxes **decrease**  
 ppGpp **increases**  $\phi_{Rb}$   $\rightarrow$  fluxes **decrease**

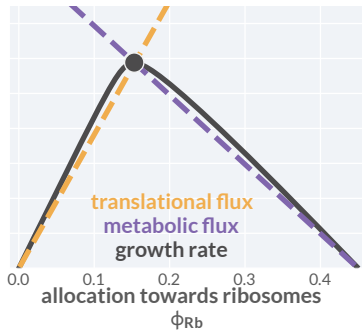

### tRNA balance too high

ppGpp **decreases**  $\phi_{Rb}$   $\rightarrow$  fluxes **decrease**  
 ppGpp **increases**  $\phi_{Rb}$   $\rightarrow$  fluxes **increase**

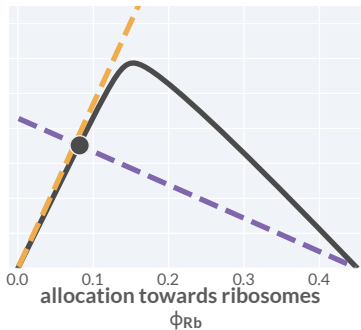

Supplement: supp [file elife-84878-supp-v1.zip › elife_poa_e84878_Figure_2_figure_supplement_1.pdf]
