# Supplementary material for: An optimal regulation of fluxes dictates microbial growth in and out of steady state
Source: eLife journal article supplement (doi:10.7554/elife.84878), 2023-03-10
Supplement: supp [file elife-84878-supp-v1.zip › elife_poa_e84878_Figure_3_source_data_1.csv]

#####################################################################################
# Relative ppGpp Concentrations in E. coli
# =================================================
# Collated measurements of the steady-state ppGpp concentration relative observed to
# that in a steady-state growth rate of approximately 1 per hour in E. coli.
# Growth rates are provided in inverse hours. The "notes" column provides details
# regarding where the data came from in each source entry.
#####################################################################################
growth_rate_hr	relative_ppGpp	source	notes
0.119	2.878	Wu et al., 2021	Data digitized from red squares in Fig. S12 A
0.327	2.149	Wu et al., 2021	Data digitized from red squares in Fig. S12 A
0.338	1.730	Wu et al., 2021	Data digitized from red squares in Fig. S12 A
0.367	1.635	Wu et al., 2021	Data digitized from red squares in Fig. S12 A
0.356	1.892	Wu et al., 2021	Data digitized from red squares in Fig. S12 A
0.431	1.878	Wu et al., 2021	Data digitized from red squares in Fig. S12 A
0.653	1.311	Wu et al., 2021	Data digitized from red squares in Fig. S12 A
0.683	1.122	Wu et al., 2021	Data digitized from red squares in Fig. S12 A
0.960	1.027	Wu et al., 2021	Data digitized from red squares in Fig. S12 A
0.318	1.620	Hernandez & Bremer, 1990	Data digitized from Figure 3. Relative concentration computed to measurement from condition with a growth rate of 0.9, closest to that used in Wu et al., 2021
0.458	1.604	Hernandez & Bremer, 1990	Data digitized from Figure 3. Relative concentration computed to measurement from condition with a growth rate of 0.9, closest to that used in Wu et al., 2021
0.598	1.223	Hernandez & Bremer, 1990	Data digitized from Figure 3. Relative concentration computed to measurement from condition with a growth rate of 0.9, closest to that used in Wu et al., 2021
0.726	1.131	Hernandez & Bremer, 1990	Data digitized from Figure 3. Relative concentration computed to measurement from condition with a growth rate of 0.9, closest to that used in Wu et al., 2021
0.901	1.000	Hernandez & Bremer, 1990	Data digitized from Figure 3. Relative concentration computed to measurement from condition with a growth rate of 0.9, closest to that used in Wu et al., 2021
0.739	0.743	Hernandez & Bremer, 1990	Data digitized from Figure 3. Relative concentration computed to measurement from condition with a growth rate of 0.9, closest to that used in Wu et al., 2021
1.294	0.315	Hernandez & Bremer, 1990	Data digitized from Figure 3. Relative concentration computed to measurement from condition with a growth rate of 0.9, closest to that used in Wu et al., 2021
1.340	0.357	Hernandez & Bremer, 1990	Data digitized from Figure 3. Relative concentration computed to measurement from condition with a growth rate of 0.9, closest to that used in Wu et al., 2021
1.479	0.392	Hernandez & Bremer, 1990	Data digitized from Figure 3. Relative concentration computed to measurement from condition with a growth rate of 0.9, closest to that used in Wu et al., 2021
0.774	0.340	Büke et al., 2022	Data digitized from panels B and E of Figure 1. Panel B was used to determine ppGpp concentration for each inducer level and panel E was used to infer the mean (center line in box) growth rate. Relative value was calculated from Doxycycline 0 sample, which had growth rate closest to that in Wu et al., 2021
0.915	0.771297727568224	Büke et al., 2022	Data digitized from panels B and E of Figure 1. Panel B was used to determine ppGpp concentration for each inducer level and panel E was used to infer the mean (center line in box) growth rate. Relative value was calculated from Doxycycline 0 sample, which had growth rate closest to that in Wu et al., 2021
0.982	1	Büke et al., 2022	Data digitized from panels B and E of Figure 1. Panel B was used to determine ppGpp concentration for each inducer level and panel E was used to infer the mean (center line in box) growth rate. Relative value was calculated from Doxycycline 0 sample, which had growth rate closest to that in Wu et al., 2021
0.491	4.8517646378989	Büke et al., 2022	Data digitized from panels B and E of Figure 1. Panel B was used to determine ppGpp concentration for each inducer level and panel E was used to infer the mean (center line in box) growth rate. Relative value was calculated from Doxycycline 0 sample, which had growth rate closest to that in Wu et al., 2021
0.149	7.74192802762168	Büke et al., 2022	Data digitized from panels B and E of Figure 1. Panel B was used to determine ppGpp concentration for each inducer level and panel E was used to infer the mean (center line in box) growth rate. Relative value was calculated from Doxycycline 0 sample, which had growth rate closest to that in Wu et al., 2021
0.767	1.000	Sarubbi et al., 1988	Digitized from Fig. 1. Relative values computed to the 0.767 growth rate condition, which is closest to that of Wu et al. 2021
0.749	1.231	Sarubbi et al., 1988	Digitized from Fig. 1. Relative values computed to the 0.767 growth rate condition, which is closest to that of Wu et al. 2021
0.641	3.129	Sarubbi et al., 1988	Digitized from Fig. 1. Relative values computed to the 0.767 growth rate condition, which is closest to that of Wu et al. 2021
0.489	5.875	Sarubbi et al., 1988	Digitized from Fig. 1. Relative values computed to the 0.767 growth rate condition, which is closest to that of Wu et al. 2021
0.355	7.541	Sarubbi et al., 1988	Digitized from Fig. 1. Relative values computed to the 0.767 growth rate condition, which is closest to that of Wu et al. 2021
0.201	10.080	Sarubbi et al., 1988	Digitized from Fig. 1. Relative values computed to the 0.767 growth rate condition, which is closest to that of Wu et al. 2021
0.295	1.783	Lazzarini et al., 1971	Digitized from Fig. 1 A In Imholz et al., 2020. Relative value calculated to the 1.091 condition, which is closest to that of Wu et al. 2021
0.682	1.145	Lazzarini et al., 1971	Digitized from Fig. 1 A In Imholz et al., 2020. Relative value calculated to the 1.091 condition, which is closest to that of Wu et al. 2021
1.091	1.000	Lazzarini et al., 1971	Digitized from Fig. 1 A In Imholz et al., 2020. Relative value calculated to the 1.091 condition, which is closest to that of Wu et al. 2021
1.500	0.783	Lazzarini et al., 1971	Digitized from Fig. 1 A In Imholz et al., 2020. Relative value calculated to the 1.091 condition, which is closest to that of Wu et al. 2021
0.648	2.062	Sokawa et al., 1975	Digitized from Fig. 1 A In Imholz et al., 2020. Relative value calculated to the 1.221 condition, which is closest to that of Wu et al. 2021
1.221	1.000	Sokawa et al., 1975	Digitized from Fig. 1 A In Imholz et al., 2020. Relative value calculated to the 1.221 condition, which is closest to that of Wu et al. 2021
1.690	0.481	Sokawa et al., 1975	Digitized from Fig. 1 A In Imholz et al., 2020. Relative value calculated to the 1.221 condition, which is closest to that of Wu et al. 2021
0.455	2.100	Ryals et al., 1981	Digitized from Fig. 1 A In Imholz et al., 2020. Relative value calculated to the 1.091 condition, which is closest to that of Wu et al. 2021
0.477	1.825	Ryals et al., 1981	Digitized from Fig. 1 A In Imholz et al., 2020. Relative value calculated to the 1.091 condition, which is closest to that of Wu et al. 2021
0.477	1.399	Ryals et al., 1981	Digitized from Fig. 1 A In Imholz et al., 2020. Relative value calculated to the 1.091 condition, which is closest to that of Wu et al. 2021
1.136	1.082	Ryals et al., 1981	Digitized from Fig. 1 A In Imholz et al., 2020. Relative value calculated to the 1.091 condition, which is closest to that of Wu et al. 2021
1.091	1.000	Ryals et al., 1981	Digitized from Fig. 1 A In Imholz et al., 2020. Relative value calculated to the 1.091 condition, which is closest to that of Wu et al. 2021
1.205	0.903	Ryals et al., 1981	Digitized from Fig. 1 A In Imholz et al., 2020. Relative value calculated to the 1.091 condition, which is closest to that of Wu et al. 2021
1.250	0.807	Ryals et al., 1981	Digitized from Fig. 1 A In Imholz et al., 2020. Relative value calculated to the 1.091 condition, which is closest to that of Wu et al. 2021
1.295	0.780	Ryals et al., 1981	Digitized from Fig. 1 A In Imholz et al., 2020. Relative value calculated to the 1.091 condition, which is closest to that of Wu et al. 2021
1.341	0.752	Ryals et al., 1981	Digitized from Fig. 1 A In Imholz et al., 2020. Relative value calculated to the 1.091 condition, which is closest to that of Wu et al. 2021
1.795	0.367	Ryals et al., 1981	Digitized from Fig. 1 A In Imholz et al., 2020. Relative value calculated to the 1.091 condition, which is closest to that of Wu et al. 2021
1.886	0.339	Ryals et al., 1981	Digitized from Fig. 1 A In Imholz et al., 2020. Relative value calculated to the 1.091 condition, which is closest to that of Wu et al. 2021
1.841	0.284	Ryals et al., 1981	Digitized from Fig. 1 A In Imholz et al., 2020. Relative value calculated to the 1.091 condition, which is closest to that of Wu et al. 2021
0.591	1.462	Baracchini et al., 1988	Digitized from Fig. 1 A In Imholz et al., 2020. Relative value calculated to the 1.000 condition, which is closest to that of Wu et al. 2021
1.000	1.000	Baracchini et al., 1988	Digitized from Fig. 1 A In Imholz et al., 2020. Relative value calculated to the 1.000 condition, which is closest to that of Wu et al. 2021
1.045	0.862	Baracchini et al., 1988	Digitized from Fig. 1 A In Imholz et al., 2020. Relative value calculated to the 1.000 condition, which is closest to that of Wu et al. 2021
1.045	0.677	Baracchini et al., 1988	Digitized from Fig. 1 A In Imholz et al., 2020. Relative value calculated to the 1.000 condition, which is closest to that of Wu et al. 2021
1.500	0.308	Baracchini et al., 1988	Digitized from Fig. 1 A In Imholz et al., 2020. Relative value calculated to the 1.000 condition, which is closest to that of Wu et al. 2021
0.500	1.811	Buckstein et al., 2008	Digitized from Fig. 1 A In Imholz et al., 2020. Relative value calculated to the 0.983 condition, which is closest to that of Wu et al. 2021
0.983	1.000	Buckstein et al., 2008	Digitized from Fig. 1 A In Imholz et al., 2020. Relative value calculated to the 0.983 condition, which is closest to that of Wu et al. 2021
1.994	0.470	Buckstein et al., 2008	Digitized from Fig. 1 A In Imholz et al., 2020. Relative value calculated to the 0.983 condition, which is closest to that of Wu et al. 2021
0.348	1.726	Imholz et al., 2020	Digitized from Fig. 1A. All replicates averaged for each growth medium. Relative value calculated relative to the 1.04 condition, which is closest to that of Wu et al. 2021. Strain is MG1655
0.460	1.53663120567376	Imholz et al., 2020	Digitized from Fig. 1A. All replicates averaged for each growth medium. Relative value calculated relative to the 1.04 condition, which is closest to that of Wu et al. 2021. Strain is MG1655
0.659	1.489	Imholz et al., 2020	Digitized from Fig. 1A. All replicates averaged for each growth medium. Relative value calculated relative to the 1.04 condition, which is closest to that of Wu et al. 2021. Strain is MG1655
1.04	1	Imholz et al., 2020	Digitized from Fig. 1A. All replicates averaged for each growth medium. Relative value calculated relative to the 1.04 condition, which is closest to that of Wu et al. 2021. Strain is MG1655
1.521	0.730496453900709	Imholz et al., 2020	Digitized from Fig. 1A. All replicates averaged for each growth medium. Relative value calculated relative to the 1.04 condition, which is closest to that of Wu et al. 2021. Strain is MG1655
0.696	1.25249431122002	Imholz et al., 2020	Digitized from Fig. 1A. All replicates averaged for each growth medium. Relative value calculated relative to the 0.980 condition, which is closest to that of Wu et al. 2021. Strain is NCM3722
0.875	0.601	Imholz et al., 2020	Digitized from Fig. 1A. All replicates averaged for each growth medium. Relative value calculated relative to the 0.980 condition, which is closest to that of Wu et al. 2021. Strain is NCM3722
0.980	1.000	Imholz et al., 2020	Digitized from Fig. 1A. All replicates averaged for each growth medium. Relative value calculated relative to the 0.980 condition, which is closest to that of Wu et al. 2021. Strain is NCM3722
1.399	0.705	Imholz et al., 2020	Digitized from Fig. 1A. All replicates averaged for each growth medium. Relative value calculated relative to the 0.980 condition, which is closest to that of Wu et al. 2021. Strain is NCM3722
2.430	0.428	Imholz et al., 2020	Digitized from Fig. 1A. All replicates averaged for each growth medium. Relative value calculated relative to the 0.980 condition, which is closest to that of Wu et al. 2021. Strain is NCM3722
2.542	0.502	Imholz et al., 2020	Digitized from Fig. 1A. All replicates averaged for each growth medium. Relative value calculated relative to the 0.980 condition, which is closest to that of Wu et al. 2021. Strain is NCM3722
0.430	0.831	Imholz et al., 2020	Digitized from Fig. 1A. All replicates averaged for each growth medium. Relative value calculated relative to the 1.085 condition, which is closest to that of Wu et al. 2021. Strain is CF7968
0.635	0.830	Imholz et al., 2020	Digitized from Fig. 1A. All replicates averaged for each growth medium. Relative value calculated relative to the 1.085 condition, which is closest to that of Wu et al. 2021. Strain is CF7968
0.869	0.529	Imholz et al., 2020	Digitized from Fig. 1A. All replicates averaged for each growth medium. Relative value calculated relative to the 1.085 condition, which is closest to that of Wu et al. 2021. Strain is CF7968
0.892	0.787	Imholz et al., 2020	Digitized from Fig. 1A. All replicates averaged for each growth medium. Relative value calculated relative to the 1.085 condition, which is closest to that of Wu et al. 2021. Strain is CF7968
1.085	1.000	Imholz et al., 2020	Digitized from Fig. 1A. All replicates averaged for each growth medium. Relative value calculated relative to the 1.085 condition, which is closest to that of Wu et al. 2021. Strain is CF7968
1.572	0.450	Imholz et al., 2020	Digitized from Fig. 1A. All replicates averaged for each growth medium. Relative value calculated relative to the 1.085 condition, which is closest to that of Wu et al. 2021. Strain is CF7968
