# Supplementary material for: An optimal regulation of fluxes dictates microbial growth in and out of steady state
Source: eLife journal article supplement (doi:10.7554/elife.84878), 2023-03-10
Supplement: supp [file elife-84878-supp-v1.zip › elife_poa_e84878_Figure_3_source_data_2.csv]

#####################################################################################
# Protein Overexpression Effects in E. coli
# =================================================
# Collated measurements of the overexpressed protein proteome mass fractions and
# the relative steady-state growth rates in E. coli. Growth rates are provided in
# inverse hours. The "notes" column provides details regarding where the data
# came from in each source entry.
#####################################################################################
phi_X	growth_rate_hr	relative_growth_rate	source	protein	medium	notes
0.002510630758327460	1.0096385542168700	1.0000000000000000	Bentley et al., 1990	β-lactamase	M9 + cAA	Digitized from Fig. 4 of Scott et al., 2010
0.07446491849751960	0.8289156626506030	0.8210023866348430	Bentley et al., 1990	β-lactamase	M9 + cAA	Digitized from Fig. 4 of Scott et al., 2010
0.09984053862508860	0.7325301204819280	0.7255369928400940	Bentley et al., 1990	β-lactamase	M9 + cAA	Digitized from Fig. 4 of Scott et al., 2010
0.18421686746988000	0.5831325301204820	0.5775656324582330	Bentley et al., 1990	β-lactamase	M9 + cAA	Digitized from Fig. 4 of Scott et al., 2010
0.03819808646350110	0.7879518072289160	1.0000000000000000	Dong et al., 1995	EF-Tu	M9 + Glycerol	Digitized from Fig. 4 of Scott et al., 2010
0.03816087880935510	0.7710843373493980	0.9785932721712540	Dong et al., 1995	EF-Tu	M9 + Glycerol	Digitized from Fig. 4 of Scott et al., 2010
0.0505138199858257	0.7710843373493980	0.9785932721712540	Dong et al., 1995	EF-Tu	M9 + Glycerol	Digitized from Fig. 4 of Scott et al., 2010
0.047898653437278600	0.7855421686746990	0.9969418960244650	Dong et al., 1995	EF-Tu	M9 + Glycerol	Digitized from Fig. 4 of Scott et al., 2010
0.05659992912827780	0.7301204819277110	0.9266055045871560	Dong et al., 1995	EF-Tu	M9 + Glycerol	Digitized from Fig. 4 of Scott et al., 2010
0.06812367115520910	0.7542168674698800	0.9571865443425080	Dong et al., 1995	EF-Tu	M9 + Glycerol	Digitized from Fig. 4 of Scott et al., 2010
0.09346739900779600	0.6433734939759040	0.8165137614678900	Dong et al., 1995	EF-Tu	M9 + Glycerol	Digitized from Fig. 4 of Scott et al., 2010
0.1472909284195610	0.6433734939759040	0.8165137614678900	Dong et al., 1995	EF-Tu	M9 + Glycerol	Digitized from Fig. 4 of Scott et al., 2010
0.19743621545003500	0.5759036144578310	0.7308868501529040	Dong et al., 1995	EF-Tu	M9 + Glycerol	Digitized from Fig. 4 of Scott et al., 2010
0.17701984408221100	0.5204819277108430	0.6605504587155960	Dong et al., 1995	EF-Tu	M9 + Glycerol	Digitized from Fig. 4 of Scott et al., 2010
0.1628277817150960	0.48674698795180700	0.617737003058103	Dong et al., 1995	EF-Tu	M9 + Glycerol	Digitized from Fig. 4 of Scott et al., 2010
0.1881927710843370	0.3855421686746990	0.4892966360856270	Dong et al., 1995	EF-Tu	M9 + Glycerol	Digitized from Fig. 4 of Scott et al., 2010
0.218777462792346	0.2506024096385540	0.3180428134556570	Dong et al., 1995	EF-Tu	M9 + Glycerol	Digitized from Fig. 4 of Scott et al., 2010
0.22875974486180000	0.37590361445783100	0.477064220183486	Dong et al., 1995	EF-Tu	M9 + Glycerol	Digitized from Fig. 4 of Scott et al., 2010
0.24110205527994300	0.3710843373493980	0.4709480122324160	Dong et al., 1995	EF-Tu	M9 + Glycerol	Digitized from Fig. 4 of Scott et al., 2010
0.27443479801559200	0.2819277108433730	0.3577981651376140	Dong et al., 1995	EF-Tu	M9 + Glycerol	Digitized from Fig. 4 of Scott et al., 2010
0.25723423104181400	0.08433734939759010	0.107033639143731	Dong et al., 1995	EF-Tu	M9 + Glycerol	Digitized from Fig. 4 of Scott et al., 2010
0.27749645641389100	0.06987951807228910	0.0886850152905198	Dong et al., 1995	EF-Tu	M9 + Glycerol	Digitized from Fig. 4 of Scott et al., 2010
0.28988660524450700	0.08674698795180720	0.110091743119266	Dong et al., 1995	EF-Tu	M9 + Glycerol	Digitized from Fig. 4 of Scott et al., 2010
0.3021172927002130	0.031325301204819100	0.0397553516819569	Dong et al., 1995	EF-Tu	M9 + Glycerol	Digitized from Fig. 4 of Scott et al., 2010
0.019934443656980900	0.9084337349397590	1.0000000000000000	Dong et al., 1995	β-galactosidase	M9 + Glycerol	Digitized from Fig. 4 of Scott et al., 2010
0.03228738483345150	0.9084337349397590	1.0000000000000000	Dong et al., 1995	β-galactosidase	M9 + Glycerol	Digitized from Fig. 4 of Scott et al., 2010
0.029608433734939800	0.8939759036144580	0.9840848806366050	Dong et al., 1995	β-galactosidase	M9 + Glycerol	Digitized from Fig. 4 of Scott et al., 2010
0.02958185683912130	0.8819277108433740	0.9708222811671090	Dong et al., 1995	β-galactosidase	M9 + Glycerol	Digitized from Fig. 4 of Scott et al., 2010
0.04107902197023390	0.8939759036144580	0.9840848806366050	Dong et al., 1995	β-galactosidase	M9 + Glycerol	Digitized from Fig. 4 of Scott et al., 2010
0.04806874557051740	0.8626506024096390	0.9496021220159160	Dong et al., 1995	β-galactosidase	M9 + Glycerol	Digitized from Fig. 4 of Scott et al., 2010
0.09291991495393340	0.7951807228915660	0.8753315649867370	Dong et al., 1995	β-galactosidase	M9 + Glycerol	Digitized from Fig. 4 of Scott et al., 2010
0.16399716513111300	0.6168674698795180	0.6790450928381960	Dong et al., 1995	β-galactosidase	M9 + Glycerol	Digitized from Fig. 4 of Scott et al., 2010
0.1630935506732810	0.6072289156626510	0.6684350132626000	Dong et al., 1995	β-galactosidase	M9 + Glycerol	Digitized from Fig. 4 of Scott et al., 2010
0.17705705173635700	0.5373493975903610	0.5915119363395220	Dong et al., 1995	β-galactosidase	M9 + Glycerol	Digitized from Fig. 4 of Scott et al., 2010
0.2507122608079380	0.327710843373494	0.360742705570292	Dong et al., 1995	β-galactosidase	M9 + Glycerol	Digitized from Fig. 4 of Scott et al., 2010
0.27155386250885900	0.1759036144578310	0.1936339522546420	Dong et al., 1995	β-galactosidase	M9 + Glycerol	Digitized from Fig. 4 of Scott et al., 2010
0.28036676116229600	0.17108433734939800	0.188328912466844	Dong et al., 1995	β-galactosidase	M9 + Glycerol	Digitized from Fig. 4 of Scott et al., 2010
0.29602055279943300	0.06746987951807220	0.0742705570291776	Dong et al., 1995	β-galactosidase	M9 + Glycerol	Digitized from Fig. 4 of Scott et al., 2010
0.0112055083569327	1.7463768115942000	1.0000000000000000	Scott et al., 2010	β-galactosidase	RDM + Glucose	Digitized from Fig. 4 of Scott et al., 2010
0.027341884613249	1.785024154589370	1.02213001383126	Scott et al., 2010	β-galactosidase	RDM + Glucose	Digitized from Fig. 4 of Scott et al., 2010
0.0100061080570826	1.7028985507246400	0.9751037344398370	Scott et al., 2010	β-galactosidase	RDM + Glucose	Digitized from Fig. 4 of Scott et al., 2010
0.043128435782109	1.5193236714975800	0.8699861687413540	Scott et al., 2010	β-galactosidase	RDM + Glucose	Digitized from Fig. 4 of Scott et al., 2010
0.121972347159753	1.1135265700483100	0.6376210235131410	Scott et al., 2010	β-galactosidase	RDM + Glucose	Digitized from Fig. 4 of Scott et al., 2010
0.140329835082459	1.0845410628019300	0.6210235131396950	Scott et al., 2010	β-galactosidase	RDM + Glucose	Digitized from Fig. 4 of Scott et al., 2010
0.172397134765950	0.9830917874396140	0.5629322268326430	Scott et al., 2010	β-galactosidase	RDM + Glucose	Digitized from Fig. 4 of Scott et al., 2010
0.18026542284413	0.8285024154589370	0.4744121715076080	Scott et al., 2010	β-galactosidase	RDM + Glucose	Digitized from Fig. 4 of Scott et al., 2010
0.205536120828475	0.8140096618357490	0.4661134163208860	Scott et al., 2010	β-galactosidase	RDM + Glucose	Digitized from Fig. 4 of Scott et al., 2010
0.249108778943861	0.7222222222222220	0.4135546334716460	Scott et al., 2010	β-galactosidase	RDM + Glucose	Digitized from Fig. 4 of Scott et al., 2010
0.262818590704648	0.6497584541062800	0.3720608575380360	Scott et al., 2010	β-galactosidase	RDM + Glucose	Digitized from Fig. 4 of Scott et al., 2010
0.192675884280082	0.6256038647343000	0.3582295988935000	Scott et al., 2010	β-galactosidase	RDM + Glucose	Digitized from Fig. 4 of Scott et al., 2010
0.0102504303403854	0.9154589371980680	1.0000000000000000	Scott et al., 2010	β-galactosidase	cAA + Glucose	Digitized from Fig. 4 of Scott et al., 2010
0.0308401354878117	0.8285024154589370	0.9050131926121370	Scott et al., 2010	β-galactosidase	cAA + Glucose	Digitized from Fig. 4 of Scott et al., 2010
0.046920983952468	0.8188405797101450	0.8944591029023740	Scott et al., 2010	β-galactosidase	cAA + Glucose	Digitized from Fig. 4 of Scott et al., 2010
0.187906046976512	0.47584541062801900	0.519788918205804	Scott et al., 2010	β-galactosidase	cAA + Glucose	Digitized from Fig. 4 of Scott et al., 2010
0.198073185629408	0.3212560386473430	0.3509234828496040	Scott et al., 2010	β-galactosidase	cAA + Glucose	Digitized from Fig. 4 of Scott et al., 2010
0.266960963962463	0.25362318840579700	0.277044854881266	Scott et al., 2010	β-galactosidase	cAA + Glucose	Digitized from Fig. 4 of Scott et al., 2010
0.32092287189739	0.20048309178744000	0.218997361477573	Scott et al., 2010	β-galactosidase	cAA + Glucose	Digitized from Fig. 4 of Scott et al., 2010
0.0110722416569493	0.630434782608696	1.000000000000000	Scott et al., 2010	β-galactosidase	M63 + Glucose	Digitized from Fig. 4 of Scott et al., 2010
0.011005608306958	0.5724637681159420	0.908045977011494	Scott et al., 2010	β-galactosidase	M63 + Glucose	Digitized from Fig. 4 of Scott et al., 2010
0.042056749403076	0.5869565217391310	0.931034482758621	Scott et al., 2010	β-galactosidase	M63 + Glucose	Digitized from Fig. 4 of Scott et al., 2010
0.074174024099062	0.5289855072463770	0.839080459770115	Scott et al., 2010	β-galactosidase	M63 + Glucose	Digitized from Fig. 4 of Scott et al., 2010
0.101604753178966	0.3937198067632850	0.624521072796934	Scott et al., 2010	β-galactosidase	M63 + Glucose	Digitized from Fig. 4 of Scott et al., 2010
0.152023988005997	0.2584541062801940	0.409961685823756	Scott et al., 2010	β-galactosidase	M63 + Glucose	Digitized from Fig. 4 of Scott et al., 2010
0.1625576100838	0.42270531400966200	0.670498084291188	Scott et al., 2010	β-galactosidase	M63 + Glucose	Digitized from Fig. 4 of Scott et al., 2010
0.229052140596368	0.2729468599033820	0.432950191570882	Scott et al., 2010	β-galactosidase	M63 + Glucose	Digitized from Fig. 4 of Scott et al., 2010
0.242817480148815	0.24879227053140100	0.39463601532567	Scott et al., 2010	β-galactosidase	M63 + Glucose	Digitized from Fig. 4 of Scott et al., 2010
0	1.14310344827586	1	Basan et al., 2015	β-galactosidase	Glucose-6-phosphate	Digitized from Fig. S4B. Growth rate at 0 expression taken as y intercept of linear fit, as not all growth rates are reported.
0.0336569579288026	1.0297455641111500	0.900833223505985	Basan et al., 2015	β-galactosidase	Glucose-6-phosphate	Digitized from Fig. S4B. Growth rate at 0 expression taken as y intercept of linear fit, as not all growth rates are reported.
0.0569579288025890	0.9886675594241720	0.864897714126728	Basan et al., 2015	β-galactosidase	Glucose-6-phosphate	Digitized from Fig. S4B. Growth rate at 0 expression taken as y intercept of linear fit, as not all growth rates are reported.
0.069902912621359	0.9422832273183800	0.824320168694814	Basan et al., 2015	β-galactosidase	Glucose-6-phosphate	Digitized from Fig. S4B. Growth rate at 0 expression taken as y intercept of linear fit, as not all growth rates are reported.
0.103559870550162	0.8806494810847000	0.770402260979075	Basan et al., 2015	β-galactosidase	Glucose-6-phosphate	Digitized from Fig. S4B. Growth rate at 0 expression taken as y intercept of linear fit, as not all growth rates are reported.
0.137216828478964	0.8397053900234350	0.73458390077465	Basan et al., 2015	β-galactosidase	Glucose-6-phosphate	Digitized from Fig. S4B. Growth rate at 0 expression taken as y intercept of linear fit, as not all growth rates are reported.
0.119093851132686	0.7774020756611990	0.680080247184761	Basan et al., 2015	β-galactosidase	Glucose-6-phosphate	Digitized from Fig. S4B. Growth rate at 0 expression taken as y intercept of linear fit, as not all growth rates are reported.
0	0.9724305323066620	1.0000000000000000	Basan et al., 2015	β-galactosidase	Glucose	Digitized from Fig. S4B. Growth rate at 0 expression taken as y intercept of linear fit, as not all growth rates are reported.
0.0284789644012945	0.8900234348845000	0.9152565713597170	Basan et al., 2015	β-galactosidase	Glucose	Digitized from Fig. S4B. Growth rate at 0 expression taken as y intercept of linear fit, as not all growth rates are reported.
0.0375404530744337	0.9004854368932040	0.9260151825521150	Basan et al., 2015	β-galactosidase	Glucose	Digitized from Fig. S4B. Growth rate at 0 expression taken as y intercept of linear fit, as not all growth rates are reported.
0.0517799352750809	0.8489454301975230	0.8730139603738840	Basan et al., 2015	β-galactosidase	Glucose	Digitized from Fig. S4B. Growth rate at 0 expression taken as y intercept of linear fit, as not all growth rates are reported.
0.073786407766990	0.8078506863073320	0.8307541356101430	Basan et al., 2015	β-galactosidase	Glucose	Digitized from Fig. S4B. Growth rate at 0 expression taken as y intercept of linear fit, as not all growth rates are reported.
0.084142394822007	0.7976397723468360	0.8202537310863610	Basan et al., 2015	β-galactosidase	Glucose	Digitized from Fig. S4B. Growth rate at 0 expression taken as y intercept of linear fit, as not all growth rates are reported.
0.099676375404531	0.7202544358888520	0.7406744358184300	Basan et al., 2015	β-galactosidase	Glucose	Digitized from Fig. S4B. Growth rate at 0 expression taken as y intercept of linear fit, as not all growth rates are reported.
0.108737864077670	0.7203716103113490	0.7407949322637840	Basan et al., 2015	β-galactosidase	Glucose	Digitized from Fig. S4B. Growth rate at 0 expression taken as y intercept of linear fit, as not all growth rates are reported.
0.124271844660194	0.6895379979912960	0.7090871533575480	Basan et al., 2015	β-galactosidase	Glucose	Digitized from Fig. S4B. Growth rate at 0 expression taken as y intercept of linear fit, as not all growth rates are reported.
0.133333333333333	0.6586206896551730	0.6772933055617720	Basan et al., 2015	β-galactosidase	Glucose	Digitized from Fig. S4B. Growth rate at 0 expression taken as y intercept of linear fit, as not all growth rates are reported.
0.16440129449838	0.6228155339805830	0.6404730346169080	Basan et al., 2015	β-galactosidase	Glucose	Digitized from Fig. S4B. Growth rate at 0 expression taken as y intercept of linear fit, as not all growth rates are reported.
0.230420711974	0.4426347505858720	0.4551839292169450	Basan et al., 2015	β-galactosidase	Glucose	Digitized from Fig. S4B. Growth rate at 0 expression taken as y intercept of linear fit, as not all growth rates are reported.
0	0.9051724137931040	1.0000000000000000	Basan et al., 2015	β-galactosidase	Mannitol	Digitized from Fig. S4B. Growth rate at 0 expression taken as y intercept of linear fit, as not all growth rates are reported.
0.031067961165049	0.8435051891529960	0.9318723994452140	Basan et al., 2015	β-galactosidase	Mannitol	Digitized from Fig. S4B. Growth rate at 0 expression taken as y intercept of linear fit, as not all growth rates are reported.
0.054368932038835	0.8075995982591230	0.8922052704576970	Basan et al., 2015	β-galactosidase	Mannitol	Digitized from Fig. S4B. Growth rate at 0 expression taken as y intercept of linear fit, as not all growth rates are reported.
0.081553398058252	0.7613993973886850	0.8411650485436900	Basan et al., 2015	β-galactosidase	Mannitol	Digitized from Fig. S4B. Growth rate at 0 expression taken as y intercept of linear fit, as not all growth rates are reported.
0.089320388349515	0.6994308670907270	0.7727045769764220	Basan et al., 2015	β-galactosidase	Mannitol	Digitized from Fig. S4B. Growth rate at 0 expression taken as y intercept of linear fit, as not all growth rates are reported.
0.111326860841424	0.6428188818212250	0.7101618122977340	Basan et al., 2015	β-galactosidase	Mannitol	Digitized from Fig. S4B. Growth rate at 0 expression taken as y intercept of linear fit, as not all growth rates are reported.
0.128155339805825	0.6016571811181790	0.6646879334257970	Basan et al., 2015	β-galactosidase	Mannitol	Digitized from Fig. S4B. Growth rate at 0 expression taken as y intercept of linear fit, as not all growth rates are reported.
0	0.868965517241379	1	Basan et al., 2015	β-galactosidase	Lactose	Digitized from Fig. S4B. Growth rate at 0 expression taken as y intercept of linear fit, as not all growth rates are reported.
0.0388349514563107	0.7970539002343490	0.917244567730005	Basan et al., 2015	β-galactosidase	Lactose	Digitized from Fig. S4B. Growth rate at 0 expression taken as y intercept of linear fit, as not all growth rates are reported.
0.0569579288025890	0.7507365249414130	0.863942826321468	Basan et al., 2015	β-galactosidase	Lactose	Digitized from Fig. S4B. Growth rate at 0 expression taken as y intercept of linear fit, as not all growth rates are reported.
0.08025889967638	0.6682792099096080	0.769051471721375	Basan et al., 2015	β-galactosidase	Lactose	Digitized from Fig. S4B. Growth rate at 0 expression taken as y intercept of linear fit, as not all growth rates are reported.
0.122977346278317	0.5964178105122200	0.686353829557714	Basan et al., 2015	β-galactosidase	Lactose	Digitized from Fig. S4B. Growth rate at 0 expression taken as y intercept of linear fit, as not all growth rates are reported.
0.186407766990291	0.5299966521593570	0.609916782246879	Basan et al., 2015	β-galactosidase	Lactose	Digitized from Fig. S4B. Growth rate at 0 expression taken as y intercept of linear fit, as not all growth rates are reported.
0.18770226537217	0.4834616672246400	0.556364617044229	Basan et al., 2015	β-galactosidase	Lactose	Digitized from Fig. S4B. Growth rate at 0 expression taken as y intercept of linear fit, as not all growth rates are reported.
0	0.5471072463768110	1.0000000000000000	Bentley et al., 1990	β-lactamase	Μ9	Digitized from Fig. 10
0.13280000000000000	0.44660869565217400	0.816309231160466	Bentley et al., 1990	β-lactamase	Μ9	Digitized from Fig. 10
0.21120000000000000	0.3932985507246370	0.7188692040349240	Bentley et al., 1990	β-lactamase	Μ9	Digitized from Fig. 10
0.2304	0.30026666666666600	0.548825972704924	Bentley et al., 1990	β-lactamase	Μ9	Digitized from Fig. 10
0.40000000000000000	0.22824347826086900	0.417182334491819	Bentley et al., 1990	β-lactamase	Μ9	Digitized from Fig. 10
0	1.2949333333333300	1.0000000000000000	Bentley et al., 1990	β-lactamase	LB	Digitized from Fig. 10
0.052800000000000000	1.1782028985507200	0.9098560275051920	Bentley et al., 1990	β-lactamase	LB	Digitized from Fig. 10
0.07680000000000000	1.114086956521740	0.860343098631906	Bentley et al., 1990	β-lactamase	LB	Digitized from Fig. 10
0.12480000000000000	1.0090434782608700	0.7792242676026100	Bentley et al., 1990	β-lactamase	LB	Digitized from Fig. 10
0.17920000000000000	0.8923130434782610	0.6890802951078020	Bentley et al., 1990	β-lactamase	LB	Digitized from Fig. 10
