# Supplementary material for: An optimal regulation of fluxes dictates microbial growth in and out of steady state
Source: eLife journal article supplement (doi:10.7554/elife.84878), 2023-03-10
Supplement: supp [file elife-84878-supp-v1.zip › elife_poa_e84878_Figure_4_source_data_1.csv]

#####################################################################################
# Collated Relative Shift Magnitudes in E. coli
# =================================================
# Collated measurements of the relative shift magnitudes in E. coli under various
# nutrient upshifts. The all growth rates provided in units of inverse hours. Preshift
# steady-state growth rate	postshift steady-state growth rate	and growth rate
# immediately following the shift are given as lam_preshift	lam_postshift	and lam_dagger
# respectively. Initial shift magnitude is defined as lam_dagger / lam_preshift. Total
# shift magnitude is defined as lam_postshift / lam_preshift
#####################################################################################
lam_preshift	lam_dagger	lam_postshift	total_shift_magnitude	initial_shift_magnitude	source	notes
0.277	0.456	0.687	0.404	1.644	Korem Kohanim et al., 2018	Taken from Table S1. Includes chemostat and batch culture experiments across different temperatures. Intermediate growth rate calculated as average over first 20 - 60 min after shift.
0.173	0.317	0.687	0.252	1.831	Korem Kohanim et al., 2018	Taken from Table S1. Includes chemostat and batch culture experiments across different temperatures. Intermediate growth rate calculated as average over first 20 - 60 min after shift.
0.087	0.240	0.687	0.126	2.765	Korem Kohanim et al., 2018	Taken from Table S1. Includes chemostat and batch culture experiments across different temperatures. Intermediate growth rate calculated as average over first 20 - 60 min after shift.
0.058	0.191	0.687	0.084	3.302	Korem Kohanim et al., 2018	Taken from Table S1. Includes chemostat and batch culture experiments across different temperatures. Intermediate growth rate calculated as average over first 20 - 60 min after shift.
0.232	0.377	0.769	0.301	1.626	Korem Kohanim et al., 2018	Taken from Table S1. Includes chemostat and batch culture experiments across different temperatures. Intermediate growth rate calculated as average over first 20 - 60 min after shift.
0.145	0.254	0.463	0.314	1.748	Korem Kohanim et al., 2018	Taken from Table S1. Includes chemostat and batch culture experiments across different temperatures. Intermediate growth rate calculated as average over first 20 - 60 min after shift.
0.122	0.210	0.293	0.418	1.716	Korem Kohanim et al., 2018	Taken from Table S1. Includes chemostat and batch culture experiments across different temperatures. Intermediate growth rate calculated as average over first 20 - 60 min after shift.
0.359	0.517	0.769	0.467	1.438	Korem Kohanim et al., 2018	Taken from Table S1. Includes chemostat and batch culture experiments across different temperatures. Intermediate growth rate calculated as average over first 20 - 60 min after shift.
0.150	0.217	0.293	0.512	1.447	Korem Kohanim et al., 2018	Taken from Table S1. Includes chemostat and batch culture experiments across different temperatures. Intermediate growth rate calculated as average over first 20 - 60 min after shift.
0.229	0.403	0.463	0.495	1.755	Korem Kohanim et al., 2018	Taken from Table S1. Includes chemostat and batch culture experiments across different temperatures. Intermediate growth rate calculated as average over first 20 - 60 min after shift.
0.410	0.596	0.769	0.533	1.453	Korem Kohanim et al., 2018	Taken from Table S1. Includes chemostat and batch culture experiments across different temperatures. Intermediate growth rate calculated as average over first 20 - 60 min after shift.
0.411	0.592	0.769	0.535	1.439	Korem Kohanim et al., 2018	Taken from Table S1. Includes chemostat and batch culture experiments across different temperatures. Intermediate growth rate calculated as average over first 20 - 60 min after shift.
0.268	0.393	0.463	0.578	1.468	Korem Kohanim et al., 2018	Taken from Table S1. Includes chemostat and batch culture experiments across different temperatures. Intermediate growth rate calculated as average over first 20 - 60 min after shift.
0.783	0.785	0.769	1.018	1.002	Korem Kohanim et al., 2018	Taken from Table S1. Includes chemostat and batch culture experiments across different temperatures. Intermediate growth rate calculated as average over first 20 - 60 min after shift.
0.45	0.422377622377622	0.55	0.82	0.938616938616938	Erickson et al., 2017	Data digitized from Fig. S3. Intermediate growth rate taken from average of first 20 minutes after shift, to be consistent with Korem Kohanim et al. 2018.
0.45	0.525982773931312	0.73	0.62	1.16885060873625	Erickson et al., 2017	Data digitized from Fig. S3. Intermediate growth rate taken from average of first 20 minutes after shift, to be consistent with Korem Kohanim et al. 2018.
0.45	0.460226054195044	0.75	0.60	1.02272456487788	Erickson et al., 2017	Data digitized from Fig. S3. Intermediate growth rate taken from average of first 20 minutes after shift, to be consistent with Korem Kohanim et al. 2018.
0.45	0.612587412587413	0.86	0.52	1.36130536130536	Erickson et al., 2017	Data digitized from Fig. S3. Intermediate growth rate taken from average of first 20 minutes after shift, to be consistent with Korem Kohanim et al. 2018.
0.6	0.6422731764643040	0.7	0.9	1.07045529410717	Erickson et al., 2017	Data digitized from Fig. S3. Intermediate growth rate taken from average of first 20 minutes after shift, to be consistent with Korem Kohanim et al. 2018.
0.6	0.6245098039215690	0.76	0.789473684210526	1.04084967320262	Erickson et al., 2017	Data digitized from Fig. S3. Intermediate growth rate taken from average of first 20 minutes after shift, to be consistent with Korem Kohanim et al. 2018.
0.6	0.6824858757062140	0.85	0.705882352941176	1.13747645951036	Erickson et al., 2017	Data digitized from Fig. S3. Intermediate growth rate taken from average of first 20 minutes after shift, to be consistent with Korem Kohanim et al. 2018.
0.6	0.611111111111111	1.02	0.588235294117647	1.01851851851852	Erickson et al., 2017	Data digitized from Fig. S3. Intermediate growth rate taken from average of first 20 minutes after shift, to be consistent with Korem Kohanim et al. 2018.
0.513	0.899	1.428	0.359243697478992	1.75243664717349	Brunschede et al., 1977	Preshift growth rate taken from average of reported values for growth on succinate from Table 1. Postshift growth rate taken for glucose + amino acid value from Table 1. Intermediate growth rate calculated from average of instantaneous growth rates over first 20 min of shift (Table 2) to be consistent with Korem Kohanim et al., 2018.
0.1	1.03	1.68	0.0595238095238095	10.3	Li et al., 2018	Data digitized from Fig. 4b. Preshift growth rate taken from caption, post shift taken as approximate saturating growth rate at the end of the shift. Intermediate growth rate taken as average of instant growth rate within first 20 min of shift to be consistent with Korem Kohanim et al., 2018. This point corresponds to the shift under the carbon limitation condition
0.1	0.744	1.73	0.0578034682080925	7.44	Li et al., 2018	Data digitized from Fig. 4b. Preshift growth rate taken from caption, post shift taken as approximate saturating growth rate at the end of the shift. Intermediate growth rate taken as average of instant growth rate within first 20 min of shift to be consistent with Korem Kohanim et al., 2018. This point corresponds to the shift under the nitrogen limitation condition
0.219	0.559	1.100	0.199	2.555	Sloan and Urban, 1976	Data taken from Table S2 of Korem Kohanim et al., 2018
0.347	0.640	1.100	0.315	1.846	Sloan and Urban, 1976	Data taken from Table S2 of Korem Kohanim et al., 2018
0.547	0.798	1.100	0.497	1.457	Sloan and Urban, 1976	Data taken from Table S2 of Korem Kohanim et al., 2018
0.594	0.894	1.100	0.540	1.505	Sloan and Urban, 1976	Data taken from Table S2 of Korem Kohanim et al., 2018
0.771	0.845	1.164	0.662	1.096	Panlilio et al., 2021	Data digitized from Fig. 2A. Intermediate growth rate taken as average of measurements within first 20 mins after shift, to be consistent with Korem Kohanim et al., 2021
0.302	0.419	0.580	0.521	1.387	Panlilio et al., 2021	Data digitized from Fig. S11A. Intermediate growth rate taken as average of measurements within first 20 mins after shift, to be consistent with Korem Kohanim et al., 2021
0.910	1.110	2.450	0.371	1.220	Mori et al., 2017	Preshift growth rates taken from Table S1. Postshift growth rate given in the figure captions as 2.54. Data in Fig. S4 was digitized and Intermediate shift taken as average of points within 20 minutes of the beginning of the shift to remain consistent with Korem Kohanim et al., 2018
0.870	1.479	2.450	0.355	1.700	Mori et al., 2017	Preshift growth rates taken from Table S1. Postshift growth rate given in the figure captions as 2.54. Data in Fig. S4 was digitized and Intermediate shift taken as average of points within 20 minutes of the beginning of the shift to remain consistent with Korem Kohanim et al., 2018
0.680	1.254	2.450	0.278	1.844	Mori et al., 2017	Preshift growth rates taken from Table S1. Postshift growth rate given in the figure captions as 2.54. Data in Fig. S4 was digitized and Intermediate shift taken as average of points within 20 minutes of the beginning of the shift to remain consistent with Korem Kohanim et al., 2018
0.630	1.050	2.450	0.257	1.667	Mori et al., 2017	Preshift growth rates taken from Table S1. Postshift growth rate given in the figure captions as 2.54. Data in Fig. S4 was digitized and Intermediate shift taken as average of points within 20 minutes of the beginning of the shift to remain consistent with Korem Kohanim et al., 2018
0.440	0.989	2.450	0.180	2.248	Mori et al., 2017	Preshift growth rates taken from Table S1. Postshift growth rate given in the figure captions as 2.54. Data in Fig. S4 was digitized and Intermediate shift taken as average of points within 20 minutes of the beginning of the shift to remain consistent with Korem Kohanim et al., 2018
0.360	0.998	2.450	0.147	2.772	Mori et al., 2017	Preshift growth rates taken from Table S1. Postshift growth rate given in the figure captions as 2.54. Data in Fig. S4 was digitized and Intermediate shift taken as average of points within 20 minutes of the beginning of the shift to remain consistent with Korem Kohanim et al., 2018
0.340	0.847	2.450	0.139	2.491	Mori et al., 2017	Preshift growth rates taken from Table S1. Postshift growth rate given in the figure captions as 2.54. Data in Fig. S4 was digitized and Intermediate shift taken as average of points within 20 minutes of the beginning of the shift to remain consistent with Korem Kohanim et al., 2018
0.300	0.872	2.450	0.122	2.907	Mori et al., 2017	Preshift growth rates taken from Table S1. Postshift growth rate given in the figure captions as 2.54. Data in Fig. S4 was digitized and Intermediate shift taken as average of points within 20 minutes of the beginning of the shift to remain consistent with Korem Kohanim et al., 2018
0.100	0.741	2.450	0.041	7.410	Mori et al., 2017	Preshift growth rates taken from Table S1. Postshift growth rate given in the figure captions as 2.54. Data in Fig. S4 was digitized and Intermediate shift taken as average of points within 20 minutes of the beginning of the shift to remain consistent with Korem Kohanim et al., 2018
0.187	0.340	0.558	0.335	1.818	Oldewurtle et al., 2021	Digitized from Fig. 3A of main text. Intermediate shift taken as average of points within 20 minutes of the beginning of the shift to remain consistent with Korem Kohanim et al., 2018
0.73	1.28	1.56	0.570	1.753	Schleif, 1967	Digitized from Fig. 9 of main text. Intermediate shift taken as average of points within 20 minutes of the beginning of the shift to remain consistent with Korem Kohanim et al., 2018
