# Supplementary material for: An optimal regulation of fluxes dictates microbial growth in and out of steady state
Source: eLife journal article supplement (doi:10.7554/elife.84878), 2023-03-10
Supplement: supp [file elife-84878-supp-v1.zip › elife_poa_e84878_Supplementary_file_1.xlsx]

## Sheet: Sheet 1
Table 1
Parameter/Variable	Value	Reference	Notes
Maximum translation speed vtl,max	≈ 20 AA·s−1	Dennis and Bremer (2008); Forchhammer and Lin- dahl (1971)	Taken maximum values as typically reported in literature and textbooks
Proteinaceous mass of ribosome mRb	7459 AA	BNID:101175 Milo et al. (2010)	—
Maximum translation rate γmax	≈ 9.65 hr−1	Scott et al. (2010)	Calculated as γmax = vtl,max /mRb
Maximum metabolic rate νmax	0.001 − 20 hr−1	This study	Defined as wide range to cover physiological growth rates
Precursor concentration cpc	0.02 − 0.04 abundance (50 − 100 mM)	This study & Roe et al. (1998)	—
Precursor dissociation constant KM cpc	≈ 0.03 abundance (≈ 80 mM)	This study & Roe et al. (1998)	Approximately equivalent to total free amino acid pool concentration.
Yield coefficient on glucose Y	≈ 3×1019 AA / mmol glucose	Shiloach and Fass (2005)	Converted from conven- tional units of g cells per g glucose
Nutrient dissociation constant Kcnt	≈0.5mM	Senn et al. (1994)	Monod constant for E. coli growth on glucose
’Other ’ protein allocation parameter φO	≈ 0.55	Hui et al. (2015)	—
Ribosomal protein allocation parameter φRb	0.05 − 0.25	Scott et al. (2010)	—
Metabolic protein allocation parameter φMb	0.05 − 0.25	Scott et al. (2010) & Belliveau et al. (2021)	—
Total protein biomass M	109 − 1017 AA	This study	—
Conversion factor from mass to OD600nm	1.5 × 1017 AA / OD600nm · mL	This study	—
Charged-tRNA effective dissociation constant KM(tRNAc)	≈ 3 × 10−5 abundance (≈ 80 μM)	This study & Scott et al. (2010)	Estimated order of magnitude. See Appendix 1.8 for discussion of value dependence
Uncharged-tRNA effective dissociation constant K(tRNAu)	≈ 3 × 10−5 abundance (≈ 80 μM)	This study & Scott et al. (2010)	Estimated order of magnitude. See Appendix 1.8 for discussion of value dependence
Charged-to-uncharged- tRNA ratio threshold parameter τ	≈1	This study	Estimated value. See Appendix 1.8 for deeper discus- sion
Uncharged-tRNA maximum synthesis rate κmax	≈ 0.001 abundance · hr−1 (≈ 300 tRNAu·s−1)	This study & Belliveau et al. (2021)	Estimated value. See foot- note a.
