# Supplementary material for: An optimal regulation of fluxes dictates microbial growth in and out of steady state
Source: eLife journal article supplement (doi:10.7554/elife.84878), 2023-03-10
Supplement: supp [file elife-84878-supp-v1.zip › elife_poa_e84878_Supplementary_file_2.xlsx]

## Sheet: Sheet 1
Table 1
Study	Experiment	Source
Albertson & Nyström, 1994	Translation speed	Reported in text, paragraph 1 on pg. 185
Baracchini & Bremer, 1988	Relative ppGpp concentrationa	Digitizedb from Fig. 1 in Imholz et al. (2020)
Basan et al., 2015	Ribosome content	RNA/Proteinc in Table S4
Basan et al., 2015	LacZ overexpression	Digitizedb from Fig. S4B
Bentley et al., 1990	β-lactamase overexpression	Digitizedb from Fig. 10
Bremer & Dennis, 2008	Ribosome content	RNA/Protein c Table 2
Bremer & Dennis, 2008	Translation speed	Recalculatedd from Table 2
Bren et al., 2013	Starvation response	Digitizedb from Fig. S3
Brunschede et al., 1977	Ribosome content	RNA/Proteinc in Table 1
Brunschede et al., 1977	Nutrient upshiftd	Measurement of growth rate in Table 2
Büke et al.,2022	Relative ppGpp concentrationa	DigitizedbfromFig.1BandFig.1E.
Buckstein et al., 2008	Relative ppGpp concentrationa	Digitizedb from Fig. 1 in Imholz et al. (2020)
Coffman et al., 1971	Translation speed	Taken from Table 1 in Young and Bremer (1976)
Dai et al., 2016	Ribosome content	RNA/Proteinc in Table S3
Dai et al., 2016	Ribosome content (chloramphenicol)	RNA/Proteinc in Table S5
Dai et al., 2016	Translation speed	Elongation rate in Table S1
Dai et al., 2016	Translation speed (chloramphenicol)	Elongation rate in Table S4
Dalbow & Young, 1975	Translation speed	Table 2
Dennis & Bremer, 1974	Translation speed	Reported in text, paragraph 1 on pg. 418.
Erickson et al., 2017	Ribosome content	Digitizedb from RNA/Proteinc in Fig. S1
Erickson et al., 2017	Nutrient upshift	Digitizedb from Fig. 1 & Fig. S3.
Dong et al., 1995	EF-Tu & LacZ overexpression	Digitizedb from Fig. 4 in Scott et al. (2010)
Forchhammer & Lindahl, 1971	Ribosome content	RNA/Proteinc in Table 1
Forchhammer & Lindahl, 1971	Translation speed	Recalculatedd from Table 1
Gausing, 1972	Translation speed	Reported in text, paragraph 4 of pg. 539.
Hernandez & Bremer, 1990	Relative ppGpp concentrationa	Digitizedb from Fig. 1 in Imholz et al. (2020)
Hernandez & Bremer, 1993	Translation speed	Calculated from RNA/Protein in Table 2
Imholz et al., 2020	Relative ppGpp concentrationa	Digitizedb from Fig. 1
Kepes & Beguin, 1966	Translation speed	Taken from Table 1 in Young and Bremer (1976)
Korem Kohanim et al., 2018	Nutrient upshift	Table S1
Lacroute & Stent, 1968	Translation speed	Taken from Table 1 in Young and Bremer (1976)
Lazzarini et al., 1971	Relative ppGpp concentrationa	Digitizedb from Fig. 1 of Imholz et al. (2020)
Li et al., 2014	Ribosome content	Ribosome profiling f
Li et al., 2018	Ribosome content	RNA/Proteinc in Table S2
Li et al., 2018	Nutrient upshifte	Digitizedb from Fig. 4
Mori et al., 2017	Ribosome content	Digitizedb from RNA/Proteinc in Fig. S2
Mori et al., 2017	Nutrient upshifte	Digitizedb from Fig. S4
Morris & Hansen, 1973	Translation speed	Taken from Table 1 in Young and Bremer (1976)
Oldewurtel et al., 2021	Nutrient upshifte	Digitizedb from Fig. 3A
Panlilio et al., 2021	Nutrient upshifte	Digitizedb from Fig. 2A and S11A
Pederson, 1984	Translation speed	Taken from parenthetical values Table 1.
Ryals et al., 1982	Relative ppGpp concentrationa	Digitizedb from Fig. 1 of Imholz et al. (2020)
Sarubbi et al., 1988	Relative ppGpp concentrationa	Digitizedb from Fig. 1 of Imholz et al. (2020)
Schmidt et al., 2016	Ribosome content	Mass spectrometry f
Schleif, 1967	Translation speed	Reported in text, middle of pg. 53
Schleif, 1967	Nutrient upshifte	Digitizedb from Fig. 9
Scott et al., 2010	Ribosome content	RNA/Proteinc in Table S1
Scott et al., 2010	LacZ overexpression	Digitizedb from Fig. 4
Si et al., 2017	Ribosome content	RNA/Proteinc in Supplementary Data
Sloan & Urban, 1976	Nutrient upshifte	Taken from Table S2 of Korem Kohanim et al. (2018)
Sokawa et al. 1975	Relative ppGpp concentrationa	Digitizedb from Fig. 1 in Imholz et al. (2020)
Wu et al., 2021	Ribosome content	Digitizedb from RNA/Proteinc in Fig. 3
Wu et al., 2021	Translation speed	Digitizedb from Fig. 3E
Wu et al., 2021	Relative ppGpp concentration	Digitizedb from Fig. S12A
You et al., 2013	Ribosome content	RNA/Proteinc from Table S10
Young & Bremer, 1976	Translation speed	Table 1
Zhu & Dai, 2019	Ribosome content	Digitizedb from RNA/Proteinc in Fig. 2D
