# Supplementary material for: An optimal regulation of fluxes dictates microbial growth in and out of steady state
Source: eLife journal article supplement (doi:10.7554/elife.84878), 2023-03-10
Supplement: supp [file elife-84878-supp-v1.zip › elife_poa_e84878_Supplementary_file_3.xlsx]

## Sheet: Sheet 1
Table 1
Parameter	Value	Reference	Notes
Maximum translation speed vtl,max	≈ 10 AA · s−1	BNID: 107871 Milo et al. (2010)	Taken as maximum value typically reported in text books
Proteinaceous mass of ribosome mRb	11984 AA	Verschoor et al. (1998)	—
Maximum translation rate γmax	≈ 3.00 hr−1	This study	Calculated as γmax = vtl,max /mRb
Maximum metabolic rate νmax	0.001 - 20 hr−1	Defined as a wide range to cover physiological growth rates	—
Precursor Michaelis- Menten constant Kcpc	≈ 0.01 abundance (≈ 30 mM)	Watson (1976)	Corresponds to standing concentration of free amino acids at moderate growth rate.
