# Supplementary material for: An optimal regulation of fluxes dictates microbial growth in and out of steady state
Source: eLife journal article supplement (doi:10.7554/elife.84878), 2023-03-10
Supplement: supp [file elife-84878-supp-v1.zip › elife_poa_e84878_Supplementary_file_4.xlsx]

## Sheet: Sheet 1
Table 1
Study	Experiment	Source
Bonven & Gulløv, 1979	Translation speed	Taken from Table 1
Lacroute, 1973	Translation speed	Recalculateda from pg. 325
Metzl-Raz et al., 2017	Ribosome content	Digitizeda from Fig. 2A
Paulo et al., 2015	Ribosome content	Digitizedb from Fig. 2A in Metzl-Raz et al. (2017)
Paulo et al., 2016	Ribosome content	Digitized b from Fig. 2A in Metzl-Raz et al. (2017)
Riba et al., 2019	Translation speed	Taken from caption in Fig. 3B
Siwiak & Zielenkiewcz, 2010	Translation speed	Taken from Table 1
Waldron & Lacroute, 1975	Waldron & Lacroute, 1975	Calculatedc from Tables 4 and 5
Xia et al., 2021	Ribosome content	Digitizedb from Fig. 1C
