# Supplementary figures and images for: An optimal regulation of fluxes dictates microbial growth in and out of steady state
Source: eLife journal article supplement (doi:10.7554/elife.84878), 2023-03-10

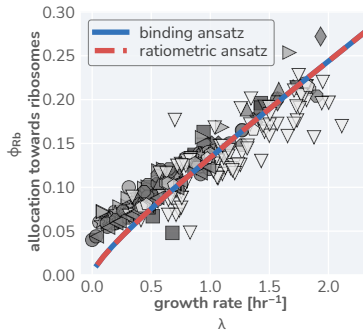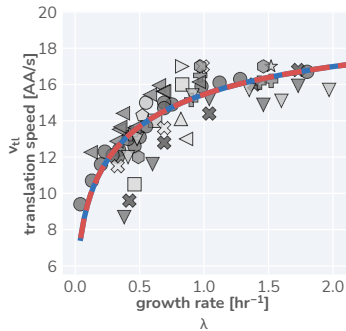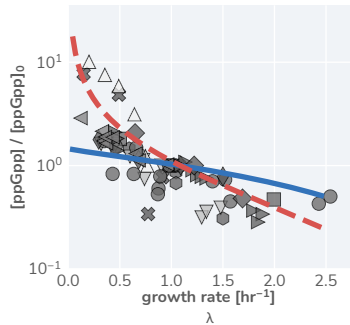

Supplement: supp [file elife-84878-supp-v1.zip]
